# Supplementary material for: ATP regeneration by a single polyphosphate kinase powers multigram-scale aldehyde synthesisin vitro
Source: Royal Society of Chemistry journal article supplement (doi:10.1039/d0gc03830j), 2020-12-22
Supplement: d0gc03830j1.pdf [file d0gc03830j1.pdf]

## Supporting Information

# ATP Regeneration by a Single Polyphosphate Kinase Powers Multigram-Scale Aldehyde Synthesis *In Vitro*

Michele Tavanti, \* Joseph Hosford, Richard C. Lloyd and Murray J. B. Brown

## Supporting Figures

Table S1. PPK2 enzymes included in the initially screened collection of enzymes. Newly identified protein sequences were assigned to a PPK2 class based on the protein sequence employed to carry out BLAST searches.

| UniProt    | Short Name | Organism                             | Transformation | Class    | Origin Classification | Reference |
|------------|------------|--------------------------------------|----------------|----------|-----------------------|-----------|
| M9XB82     | mrPPK      | <i>Meiothermus ruber</i>             | AMP→ATP        | PPK2-III | Thermophile           | 1         |
| Q9RY20     | drPPK      | <i>Deinococcus radiodurans</i>       | AMP→ATP        | PPK2-III | Mesophile             | 1         |
| A2SL03     | mpPPK      | <i>Methylibium petroleiphilum</i>    | AMP→ATP        | PPK2-III | Mesophile             | This work |
| Q8DI82     | tePPK      | <i>Thermosynechococcus elongatus</i> | AMP→ATP        | PPK2-III | Thermophile           | 1         |
| Q83XD3     | ajPAP      | <i>Acinetobacter johnsonii</i>       | AMP→ADP        | PPK2-II  | Mesophile             | 2         |
| Q9HYF1     | paPAP      | <i>Pseudomonas aeruginosa</i>        | AMP→ADP        | PPK2-II  | Mesophile             | 3         |
| H0UPE2     | tvPAP      | <i>Thermanaerovibrio velox</i>       | AMP→ADP        | PPK2-II  | Thermophile           | This work |
| A0A1H2T5S6 | mhPAP      | <i>Methanohalophilus halophilus</i>  | AMP→ADP        | PPK2-II  | Halophile             | This work |
| Q6N140     | rpPPK      | <i>Rhodopseudomonas palustris</i>    | ADP→ATP        | PPK2-I   | Mesophile             | 3         |
| Q92SA6     | rmPPK      | <i>Rhizobium meliloti</i>            | ADP→ATP        | PPK2-I   | Mesophile             | 3         |
| A0A1I4IPN4 | hrPPK      | <i>Halogramnum rubrum</i>            | ADP→ATP        | PPK2-I   | Halophile             | This work |

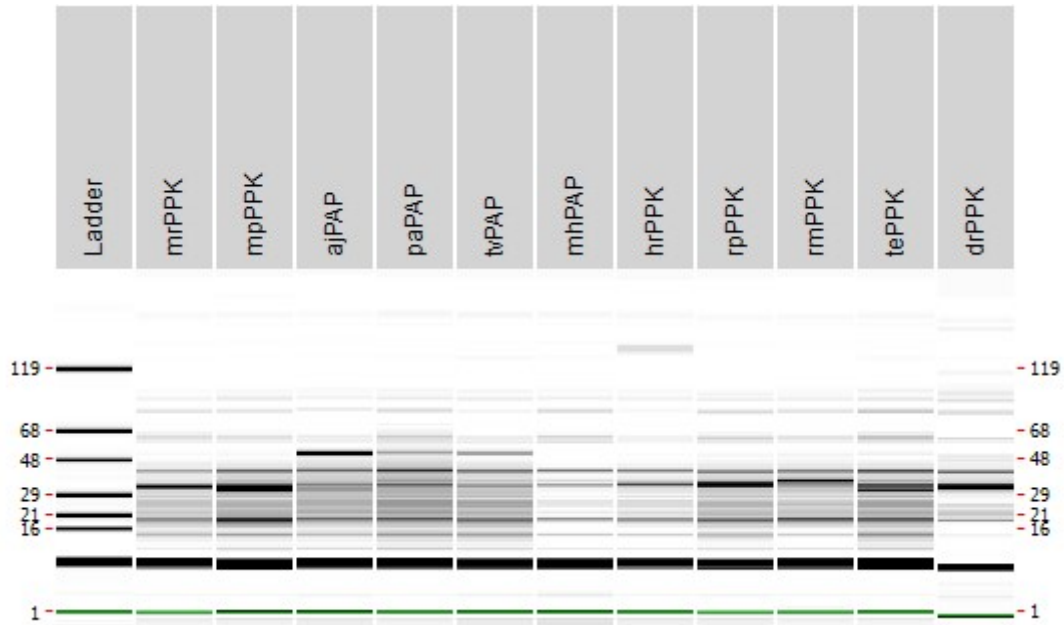

Figure S1. Capillary electrophoresis analysis of the soluble fraction obtained after lysis of *E. coli* cells expressing PPK2 enzymes listed in Table S1. Estimated molecular weights in kDa are indicated on each side of the figure. Bands corresponding to proteins with mass of ~30 kDa were expected for enzymes indicated as “PPK” (PPK2-I and PPK2-III), whereas bands corresponding to proteins with mass of ~50-60 kDa were expected for enzymes indicated as PAP (PPK2-II).

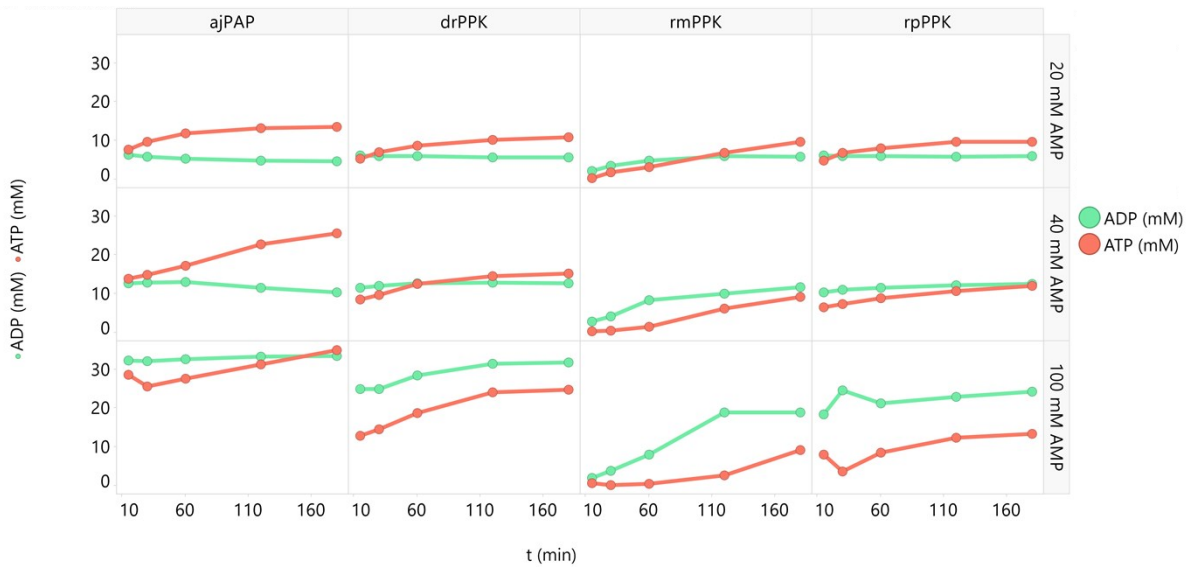

Figure S2. Reaction time course for AMP phosphorylation with different PPKs and at different AMP loadings.

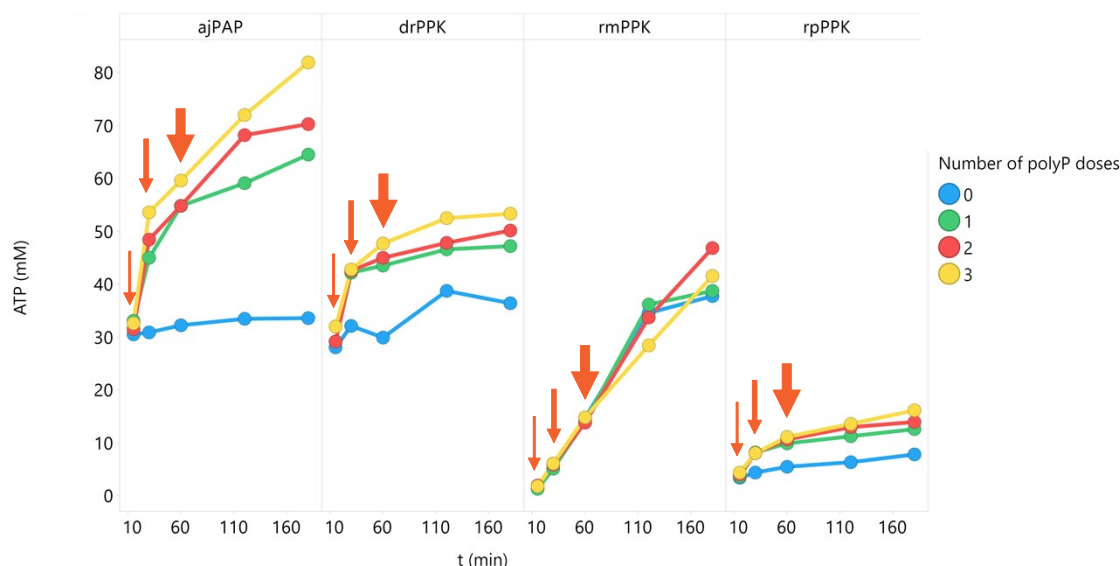

Figure S3. Reaction time course for AMP phosphorylation with different PPKs and polyP feeding. Reactions contained 200 mM polyP (based on phosphate units) at the beginning of the reaction. 100 mM polyP doses were added at 15, 30 and 60 minutes (see arrows). Reaction time course for biotransformations carried out without polyP feeding (blue), with 1 polyP dose (added at 15 minutes, green), with 2 polyP doses (added at 15 and 30 minutes, red) and 3 polyP doses (added at 15, 30 and 60 minutes, yellow) are shown.

Table S2. Desired performance criteria for ATP recycling and ATP formation rate extrapolated at 1 mg/mL ajPAP loading based on the initial ATP formation rate (30 min) observed at 10 mg/mL ATP-recycling enzyme loading. A linear relationship between enzyme loading and ATP formation rate was assumed. A model product molecular weight of 150 Da was considered for these calculations.

| Biocatalyst Formulation                                     | Lyophilised cell-free extract |
|-------------------------------------------------------------|-------------------------------|
| <b>Biocatalyst Loading (mg/mL)</b>                          | < 5                           |
| <b>ATP-Recycling Enzyme(s) Loading (mg/mL)</b>              | 1                             |
| <b>Final Product Concentration (g/L)</b>                    | 100                           |
| <b>Product Molecular Weight (Da)</b>                        | 150                           |
| <b>Final Product Concentration (M)</b>                      | 0.67                          |
| <b>Reaction Time (h)</b>                                    | 24                            |
| <b>Desired Product Formation Rate (mM/min)</b>              | 0.46                          |
| <b>Observed ATP Formation Rate (mM/min) (@ 10 mg/mL)</b>    | 1.8                           |
| <b>Extrapolated ATP Formation Rate (mM/min) (@ 1 mg/mL)</b> | 0.18                          |

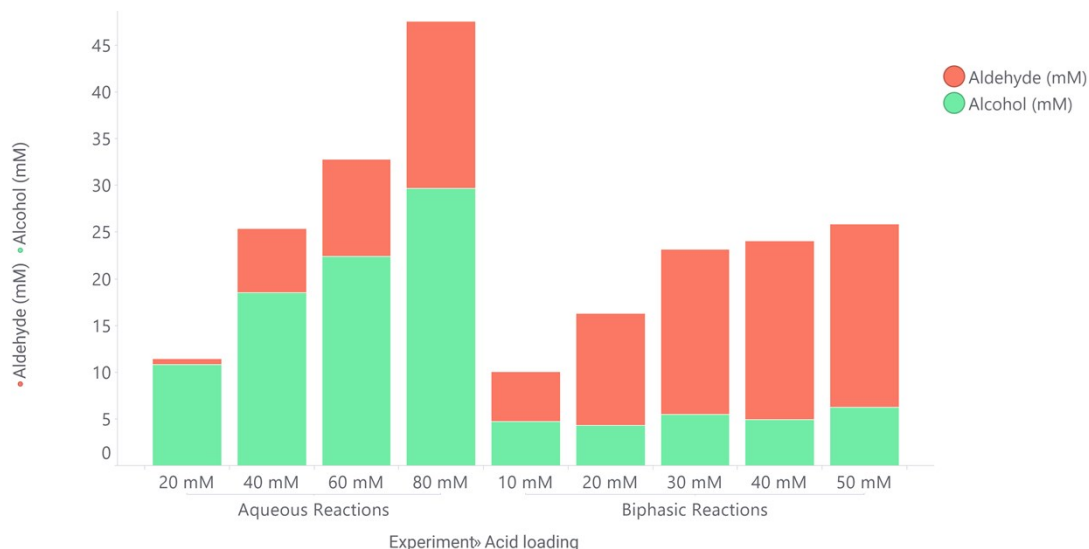

Figure S4. Product concentrations after 4-methoxybenzoic acid reduction **1** by CAR33 with dual cofactor recycling in aqueous or biphasic reactions and at different substrate loadings. The addition of a toluene overlay (50% v/v) caused the alcohol:aldehyde ratio to drop dramatically from 94% to 26% for reactions carried out with 20 mM substrate, whereas a significant change was also observed for reactions carried out with 40 mM substrate, for which the percentage of total products represented by the alcohol went from 73% in aqueous conditions to 20% for biphasic reactions.

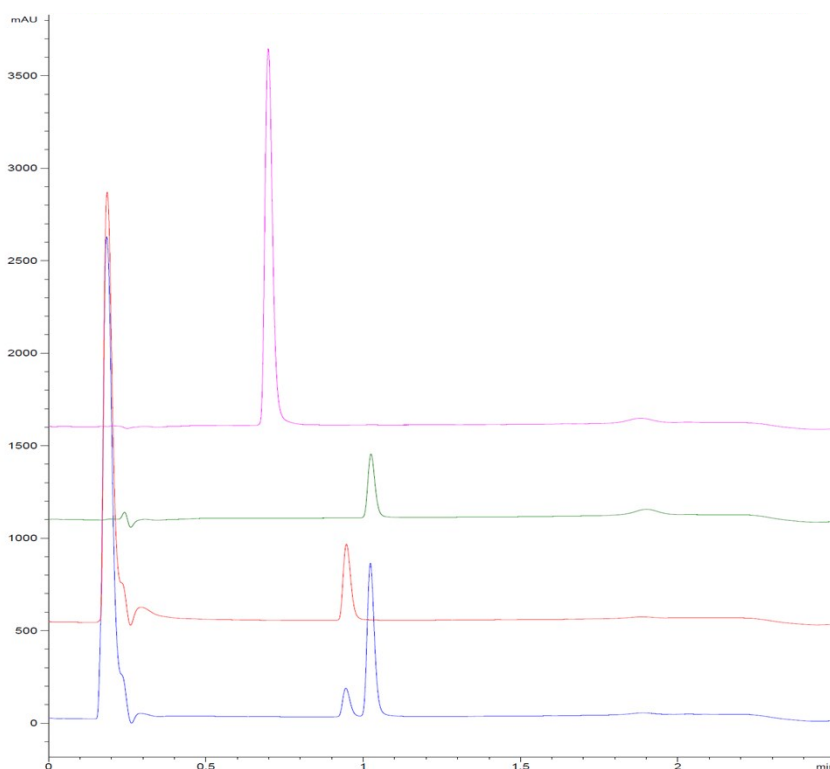

Figure S5. UPLC traces for 4-methoxybenzoic acid reduction with purified CAR33 and stoichiometric cofactors. The trace corresponding to the biotransformation (blue chromatogram) does not show detectable levels of alcohol overreduction product. UPLC traces corresponding to 4-methoxybenzyl alcohol (magenta), 4-methoxybenzaldehyde (green) and 4-methoxybenzoic acid (red) are also shown. Experiments (0.1 mL biotransformation volume) were carried out with 0.2 mg/mL purified CAR33, 10 mM NADPH, 10 mM ATP, 50 mM MgCl<sub>2</sub> and 10 mM 4-methoxybenzoic acid. Reactions were carried out in 1.5 mL Eppendorf tubes, 800 rpm, 24 h using and Eppendorf Thermomixer.

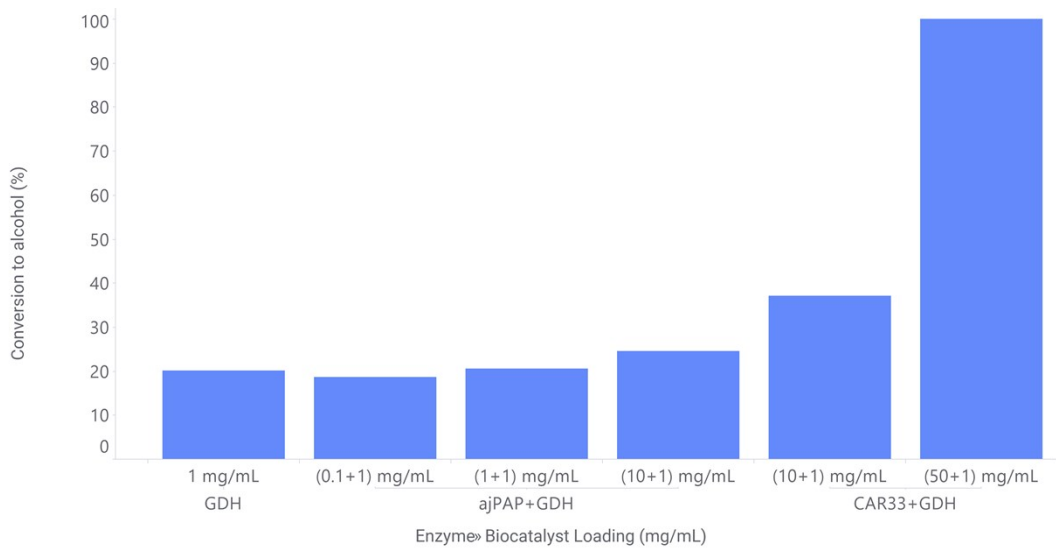

*Figure S6. Aldehyde reduction control experiments with lyophilised cell free extract.*

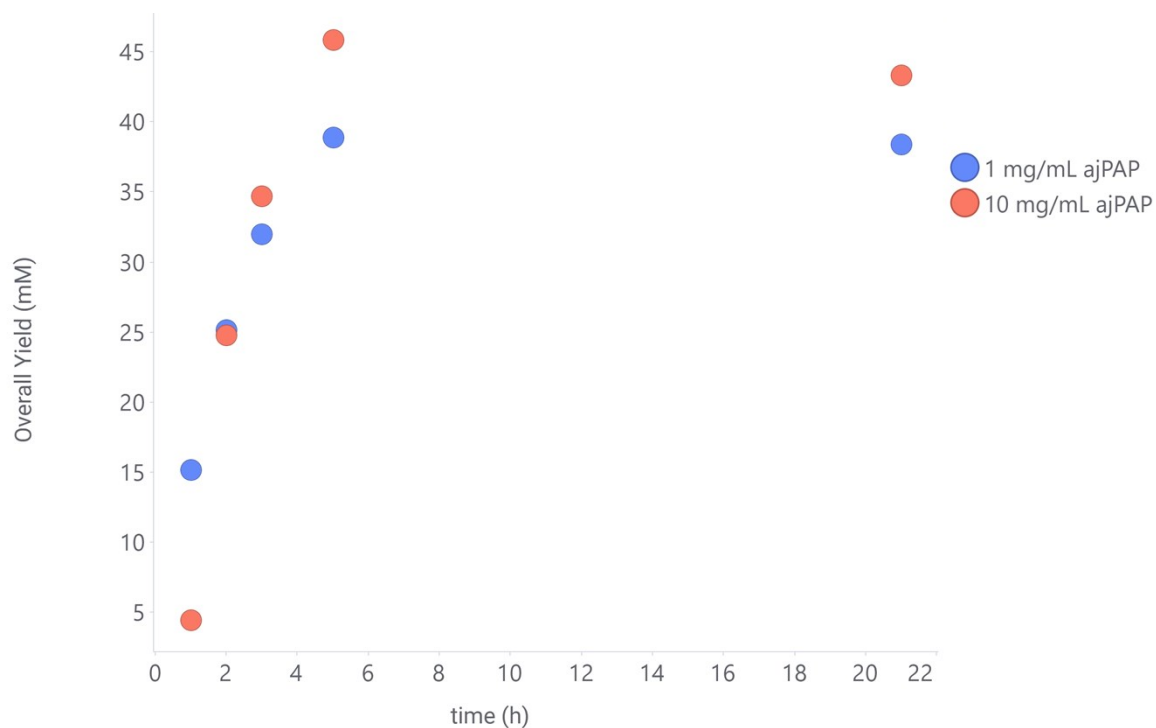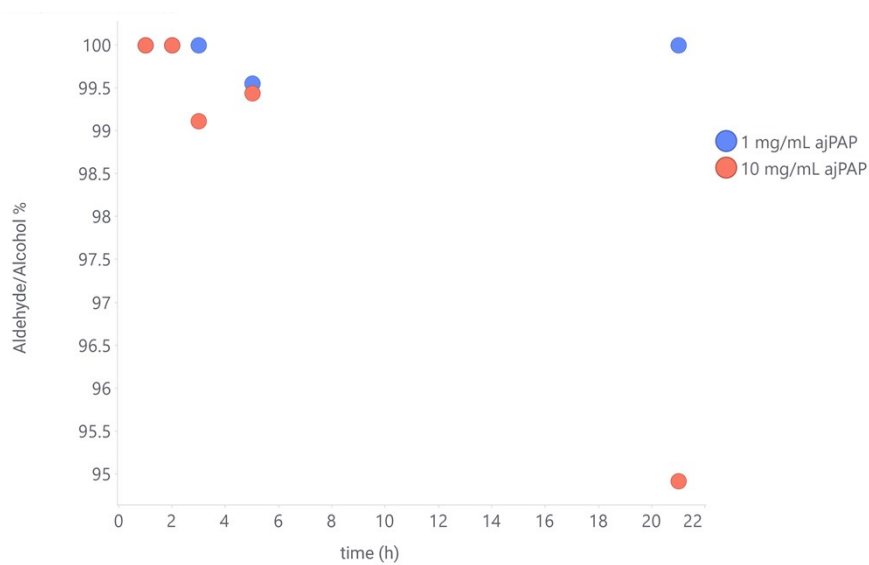

Figure S7. Time course for the CAR-catalysed 4-methoxybenzoic acid reduction with dual cofactor recycling on a 30 mL scale (150 mM substrate and 300 mM polyP, top) and product composition over time (bottom). The overall yield is the sum of aldehyde and alcohol yields.

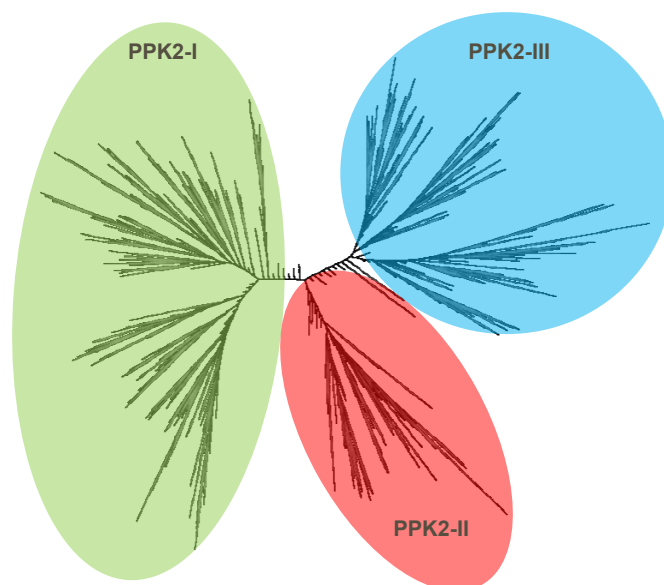

Figure S8. Phylogenetic analysis of PPK2 containing proteins (InterPro IPR022488). Clades were assigned based on the localisation of reviewed PPKs (UniProt) and the presence of signature residues. The localisation of the following PPK2-I was verified (UniProt IDs): A9CKA8, Q8NM65, A0QQV6, Q9I6Z1, Q5LU04, Q5LSN8, Q9I154, O05877, Q930V2, Q92ZU4, Q92SA6, Q5LX16. The localisation of the following PPK2-II was verified (UniProt IDs): Q9HYF1, Q886D9. The localisation of the following PPK2-III was verified (UniProt IDs): A1R8G0, Q11YW6, Q11W43, Q9RY20, D7BBL3, M9XB82, Q6N140 and Q8DI82.<sup>4</sup>

Table S3. Previously reported PPK2-III enzymes included in the PPK2-III panel developed in this work.

| UniProt | Short Name      | Organism                             | Reference |
|---------|-----------------|--------------------------------------|-----------|
| M9XB82  | mrPPK           | <i>Meiothermus ruber</i>             | 1         |
| Q9RY20  | drPPK           | <i>Deinococcus radiodurans</i>       | 1         |
| A2SL03  | mpPPK           | <i>Methylibium petroleiphilum</i>    | This work |
| A1R8G0  | aaPPK           | <i>Paenarthrobacter aurescens</i>    | 4         |
| Q11YW6  | chPPK           | <i>Cytophaga hutchinsonii</i>        | 4         |
| Q8DI82  | tePPK           | <i>Thermosynechococcus elongatus</i> | 1         |
| n.a.    | chPPK truncated | <i>Cytophaga hutchinsonii</i>        | 4         |
| D7BBL3  | msPPK           | <i>Meiothermus silvanus</i>          | 1         |
| Q11W43  | dgPPK           | <i>Deinococcus geothermalis</i>      | 1         |

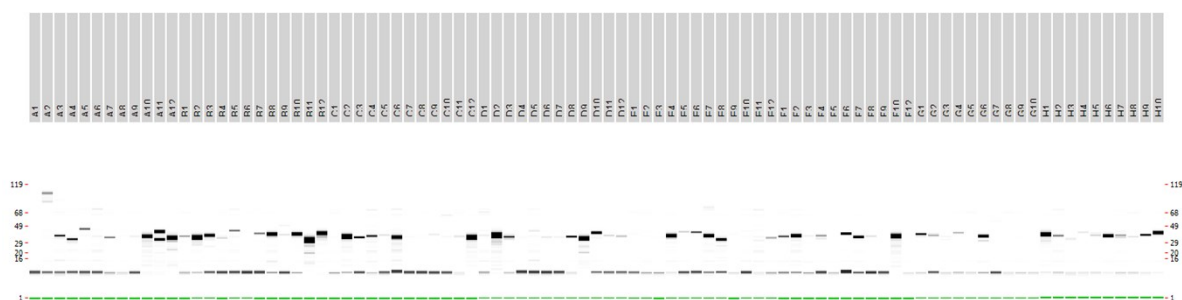

Figure S9. Capillary electrophoresis analysis of purified PPKs. The position of each protein in the panel is indicated on top of the figure. Estimated molecular weights in kDa are indicated on each side of the figure. Details about the identity of proteins in each well can be found in Table S4.

Table S4. Protein identities (UniProt ID) and well location for PPK2 enzymes included in the panel.

| Protein Name  | Well Location | UniProt_ID       |
|---------------|---------------|------------------|
| PPK1          | A01           | A0A023D3G5_ACIMT |
| PPK9          | A02           | A0A404PG99_9ZZZZ |
| PPK17         | A03           | A0A1M4SFF4_9ACTN |
| msPPK (PPK26) | A04           | D7BBL3_MEISD     |
| PPK34         | A05           | A0A0E3QUX9_METBA |
| PPK43         | A06           | A0A1V4U2Y6_9EURY |
| PPK52         | A07           | A0A2V2N5B3_9EURY |
| PPK61         | A08           | A0A0F9PPZ6_9ZZZZ |
| PPK69         | A09           | A0A1J5T696_9ZZZZ |
| PPK77         | A10           | A0A3R2J6U0_9ZZZZ |
| PPK85         | A11           | A0A407LN77_9ZZZZ |
| aaPPK         | A12           | A1R8G0           |
| PPK2          | B01           | A0A2W1NTC2_9FLAO |
| PPK10         | B02           | A0A023D3G5_ACIMT |
| PPK18         | B03           | A0A1V4HNG6_9BACL |
| PPK27         | B04           | E4U536_OCEP5     |
| PPK35         | B05           | A0A0E3SF50_9EURY |
| PPK45         | B06           | A0A1V4UIP1_9EURY |
| PPK54         | B07           | A0A3A5WLP0_9EURY |
| PPK62         | B08           | A0A0F9VM92_9ZZZZ |
| PPK70         | B09           | A0A1J5TD51_9ZZZZ |
| PPK78         | B10           | A0A3R2T7T3_9ZZZZ |
| PPK86         | B11           | A0A408TAH8_9ZZZZ |
| chPPK         | B12           | Q11YW6           |
| PPK3          | C01           | A0A148N6T5_9GAMM |
| PPK11         | C02           | A0A2G6QQJ7_9SPIO |
| PPK19         | C03           | A0A2W1NTC2_9FLAO |
| PPK28         | C04           | E8N0Z9_ANATU     |
| PPK37         | C05           | A0A101H5Y8_9EURY |
| PPK46         | C06           | A0A1V4ZAW4_9EURY |
| PPK55         | C07           | A0A3N5SB38_9ARCH |
| PPK63         | C08           | A0A0W8EH77_9ZZZZ |
| PPK71         | C09           | A0A1J5TNI1_9ZZZZ |
| PPK79         | C10           | A0A3R2YN22_9ZZZZ |
| PPK87         | C11           | E6PTV2_9ZZZZ     |
| drPPK         | C12           | Q9RY20           |
| PPK4          | D01           | A0A1E7GDI9_9EURY |
| PPK12         | D02           | A0A3D5XRJ5_9FIRM |



|                 |     |                  |
|-----------------|-----|------------------|
| PPK20           | D03 | A0A3B8TX18_PSESP |
| PPK29           | D04 | A0A148N6T5_9GAMM |
| PPK38           | D05 | A0A139CH24_9EURY |
| PPK47           | D06 | A0A1V5IHL6_9EURY |
| PPK56           | D07 | A0A3N5VUA2_9ARCH |
| PPK64           | D08 | A0A160TD52_9ZZZZ |
| PPK72           | D09 | A0A2P2C180_9ZZZZ |
| PPK80           | D10 | A0A3R3U2L0_9ZZZZ |
| PPK88           | D11 | E6QVY4_9ZZZZ     |
| mrPPK           | D12 | M9XB82           |
| PPK5            | E01 | A0A2D6AAC9_9EURY |
| PPK13           | E02 | A0A4V3DS02_9MYCO |
| PPK21           | E03 | C7LYH8_ACIFD     |
| chPPK Truncated | E04 | n.a.             |
| PPK39           | E05 | A0A1E7GDI9_9EURY |
| PPK48           | E06 | A0A2A2HQL7_9EURY |
| PPK57           | E07 | A7I4H2_METB6     |
| PPK65           | E08 | A0A1J5PSL6_9ZZZZ |
| PPK73           | E09 | A0A381YJF6_9ZZZZ |
| PPK81           | E10 | A0A3R3ZC33_9ZZZZ |
| PPK89           | E11 | A0A404PG99_9ZZZZ |
| mpPPK           | E12 | A2SL03           |
| PPK6            | F01 | M1QDU0_METMZ     |
| PPK14           | F02 | F0SXQ4_SYNGF     |
| PPK22           | F03 | A0A1H5N4P5_9MICO |
| dgPPK (PPK31)   | F04 | Q1IW43_DEIGD     |
| PPK40           | F05 | A0A1Q7BC62_9ARCH |
| PPK49           | F06 | A0A2D6AAC9_9EURY |
| PPK58           | F07 | E1RJ42_METP4     |
| PPK66           | F08 | A0A1J5QFM0_9ZZZZ |
| PPK74           | F09 | A0A382C2S6_9ZZZZ |
| PPK82           | F10 | A0A3R5FBT2_9ZZZZ |
| mCherry         | F11 | X5DSL3           |
| tePPK           | F12 | Q8DI82           |
| PPK7            | G01 | A0A1J5T696_9ZZZZ |
| PPK15           | G02 | A0A1D2P985_9CYAN |
| PPK24           | G03 | A0A0S7ASE9_MEIRU |
| PPK32           | G04 | A0A075MP24_9ARCH |
| PPK41           | G05 | A0A1Q7MEW4_9CREN |
| PPK50           | G06 | A0A2E2TV69_9EURY |
| PPK59           | G07 | M1QDU0_METMZ     |
| PPK67           | G08 | A0A1J5QR14_9ZZZZ |
| PPK75           | G09 | A0A3B0WJP4_9ZZZZ |
| PPK83           | G10 | A0A403VGV9_9ZZZZ |
| mCherry         | G11 | X5DSL3           |
| mCherry         | G12 | X5DSL3           |
| PPK8            | H01 | A0A3R2YN22_9ZZZZ |
| PPK16           | H02 | A0A1I7N6I1_9BACT |
| PPK25           | H03 | A0A2A9HF20_9CHLR |
| PPK33           | H04 | A0A0E3P3I2_9EURY |
| PPK42           | H05 | A0A1V4TV38_9EURY |
| PPK51           | H06 | A0A2I0NXE8_9EURY |
| PPK60           | H07 | EHM53_03255      |
| PPK68           | H08 | A0A1J5S232_9ZZZZ |
| PPK76           | H09 | A0A3R1QDU9_9ZZZZ |

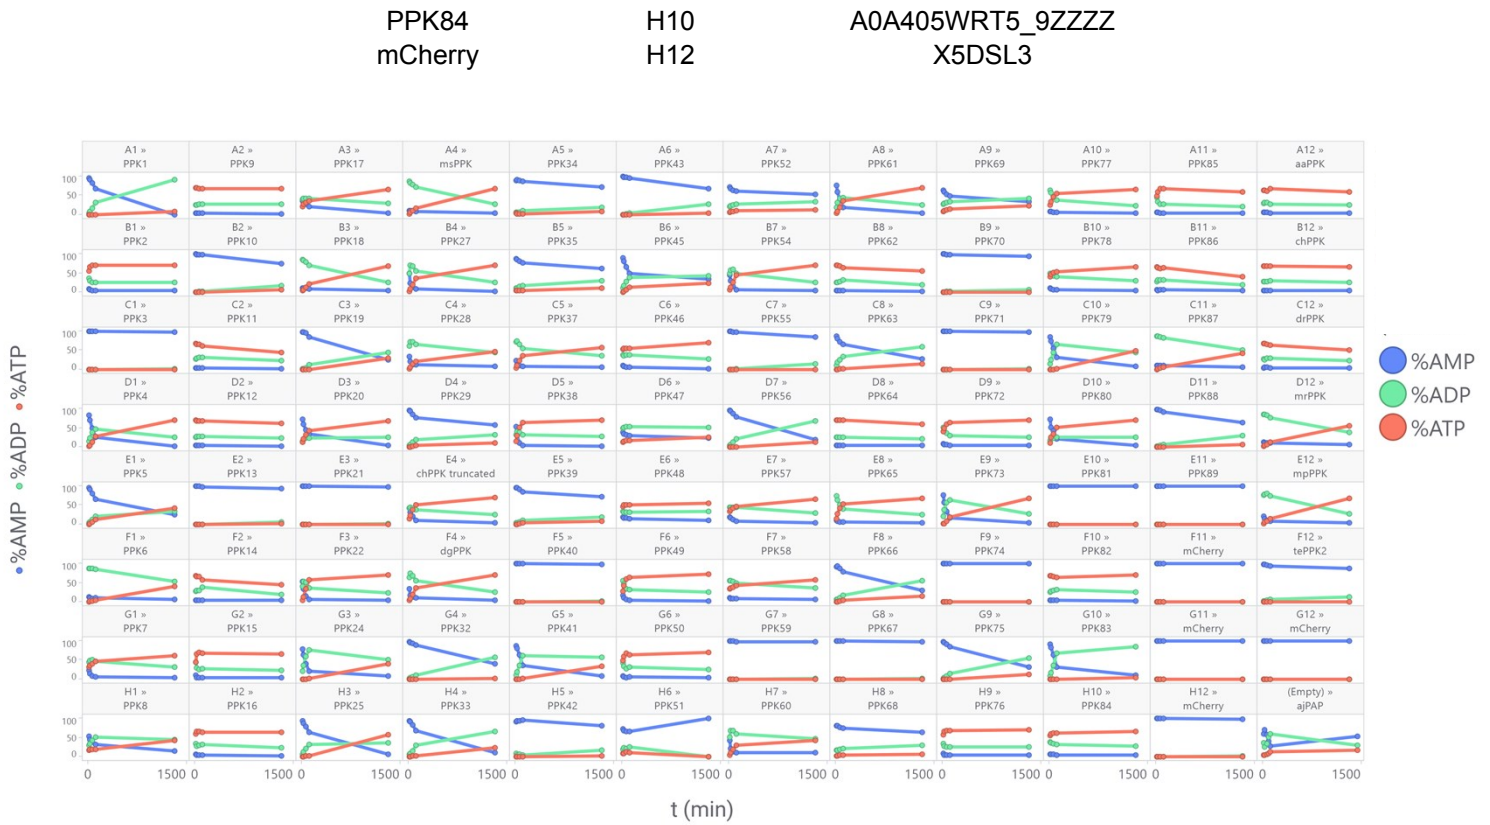

Figure S10. Time course for AMP phosphorylation by putative and characterised PPK2-III. Each panel corresponds to a specific PPK2 (plate location and assigned protein name indicated). The bottom right panel includes a purified protein experiment carried out with purified ajPAP (0.75 mg/mL) for comparison purposes. A negative control obtained from cells overexpressing mCherry was also included.

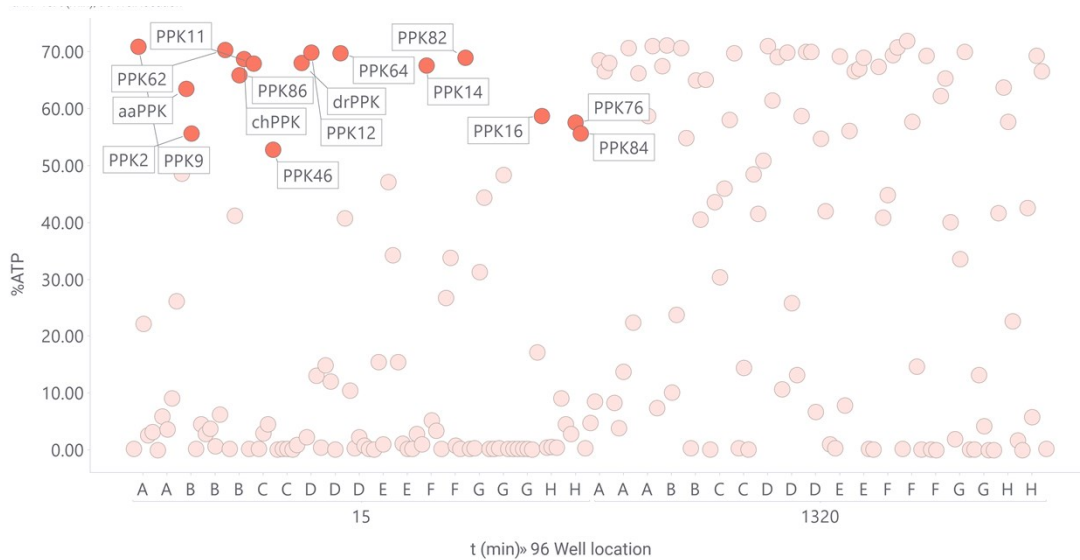

Figure S11. AMP conversion to ATP by putative and characterised PPK2-III. Data at 15 and 1320 minutes are shown. Enzymes showing higher than 50% conversion after 15 minutes are highlighted and labelled.



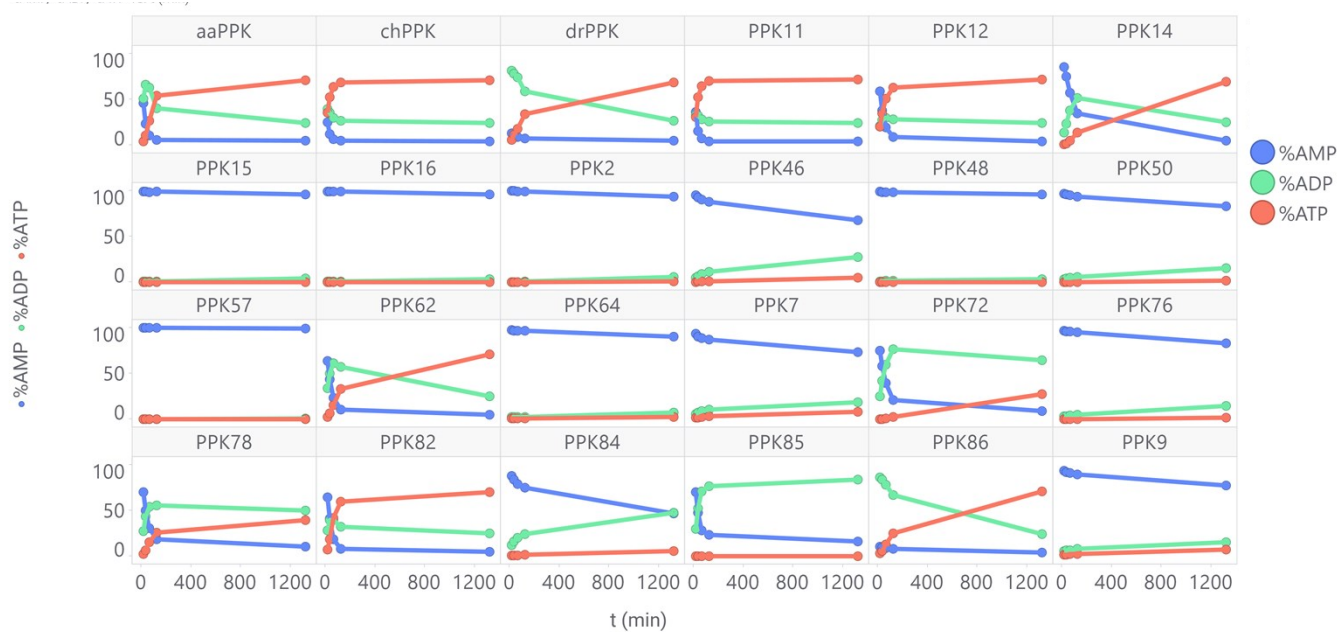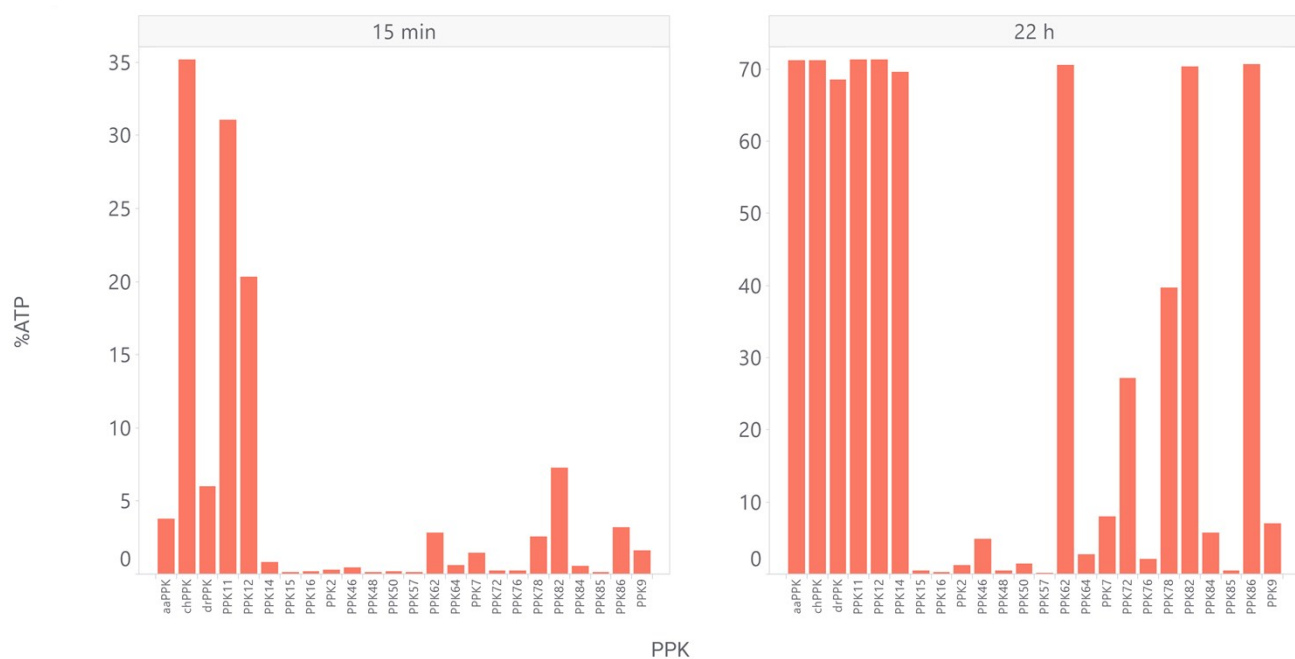

**Figure S13.** Time course for AMP phosphorylation by 24 putative and characterised PPK2-III selected after initial experiments (top panel) and AMP conversion to ATP data at 15 minutes and 22 h reaction times (bottom panel). Top: each panel corresponds to a specific PPK2 (assigned protein name indicated). Reactions (0.4 mL biotransformation volume, 30 °C, 800 rpm, 22 h) were carried out in 50 mM Tris buffer pH 7.5 and contained 30  $\mu$ L of 100-fold diluted purified protein compared to Figure S10, 5 mM AMP, 50 mM polyP (based on phosphate units) and 50 mM MgCl<sub>2</sub>.

Table S5. Novel and characterised PPK2-III enzymes selected after purified protein screening reactions. UniProt IDs, short name and sequence origin are indicated.

| UniProt              | Short Name | Origin                                  |
|----------------------|------------|-----------------------------------------|
| A1R8G0               | aaPPK      | <i>Paenarthrobacter<br/>aurescens</i>   |
| Q11YW6               | chPPK      | <i>Cytophaga hutchinsonii</i>           |
| A0A0F9VM92_9ZZ<br>ZZ | PPK62      | Marine Sediment<br>Metagenome           |
| Q9RY20               | drPPK      | <i>Deinococcus radiodurans</i>          |
| A0A2G6QQJ7_9SP<br>IO | PPK11      | <i>Treponema</i> sp.                    |
| A0A3D5XRJ5_9FIR<br>M | PPK12      | <i>Erysipelotrichaceae</i><br>bacterium |
| A0A3R5FBT2_9ZZ<br>ZZ | PPK82      | Compost Metagenome                      |

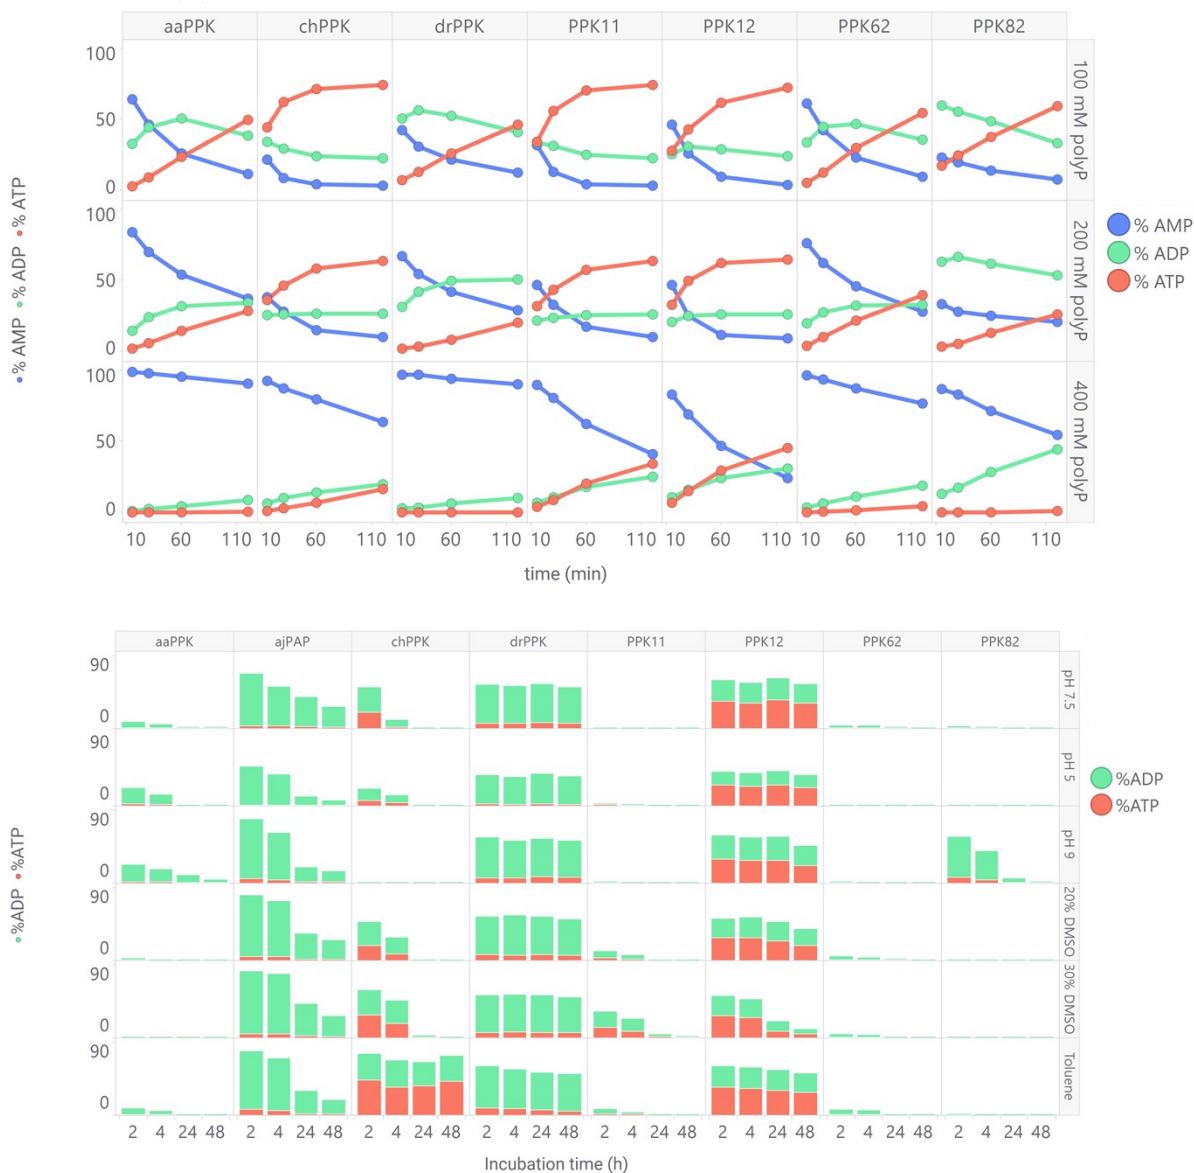

**Figure S14.** Reaction time course for AMP phosphorylation with selected PPK2 enzymes at different polyP loadings (top figure) and AMP conversion to ADP/ATP after 15 minutes reactions with enzymes pre-incubated for different amount of time (indicated in the x-axis) under different conditions (bottom figure). Reactions (0.4 mL biotransformation volume, 30 °C, 800 rpm) were carried out in 50 mM Tris buffer pH 7.5 and contained 50 µg/mL lyophilised cell free extracts, 5 mM AMP, 50 mM MgCl<sub>2</sub> and 100-400 mM polyP (100 mM polyP for stability assays, bottom figure).

|       | chPPK | tePPK | PPK12 | msPPK | mrPPK | aaPPK | dgPPK | drPPK |
|-------|-------|-------|-------|-------|-------|-------|-------|-------|
| chPPK | 100   | 49.16 | 41.61 | 43.77 | 42.8  | 38.85 | 44.11 | 41.44 |
| tePPK | 49.16 | 100   | 41.61 | 42.26 | 44.32 | 39.71 | 42.59 | 40.68 |
| PPK12 | 41.61 | 41.61 | 100   | 40.75 | 43.56 | 35.58 | 40.84 | 41.6  |
| msPPK | 43.77 | 42.26 | 40.75 | 100   | 57.58 | 47.74 | 47.51 | 41.76 |
| mrPPK | 42.8  | 44.32 | 43.56 | 57.58 | 100   | 41.89 | 49.62 | 45.83 |
| aaPPK | 38.85 | 39.71 | 35.58 | 47.74 | 41.89 | 100   | 48.87 | 48.12 |
| dgPPK | 44.11 | 42.59 | 40.84 | 47.51 | 49.62 | 48.87 | 100   | 65.04 |
| drPPK | 41.44 | 40.68 | 41.6  | 41.76 | 45.83 | 48.12 | 65.04 | 100   |

```

chPPK_tr|Q11YW6|Q11YW6_CYTH3      1 .MATDFSKLSKYVETLVRPKQSIDLKKDF.TDYD.H...KMLTKKEEGEEELNLGITSKISE
tePPK_tr|Q8DI82|Q8DI82_THEEB      1 MIPQDFLDE..INPDRIYIPAGGNFHWKDYDPGDTA...GLKSKVEAQELLAAGIKKLA
PPK12_tr|AOA3D5XRJ5|AOA3D5XRJ5_9FIRM 1 .....MINIYKIDKLNFNFL...NNHKTDDYSLCKDKDTALELTKOKNIQKLYD
msPPK_PPK26_tr|D7BBL3|D7BBL3_MEISD 1 .....MAKTIGATLNLQDIDPRSTPGFNGD...KEKALALEKLETLARLDE
mrPPK_sp|M9XB82|PK23_MEIRD         1 .....MKKYRVQPDGRFELKRFDPDTSAFEGG...KQAALEALAVLNRRLLEK
aaPPK_tr|A1R8G0|A1R8G0_PAEAT      1 MPMVAAEVFAKSPAELVLRVSGSFS..LAGVDPESLPGYTG...KADGKALLAAQDARLAE
dgPPK_PPK31_tr|Q1IW43|Q1IW43_DEIGD 1 .....MQLDRYRVPFGQR..VRLSNWPTDDGGLS...KAEGEALLPDLQQLRLAN
drPPK_tr|Q9RY20|Q9RY20_DEIRA      1 .....MDIDNRYVKPGKR..VKLSLWATDDAGLS...KEEQAALAKLAGEALAE

```

```

chPPK_tr|Q11YW6|Q11YW6_CYTH3      57 IQKLYASGT...KCVLIVFOAMDAAAGKDGTVKHMIGLNPQGVKVTSPKVPKIEISH
tePPK_tr|Q8DI82|Q8DI82_THEEB      56 YQDLYAQN...YGLLIIFOAMDAAAGKDGSTIKHVMGSLNPQACRVYSPKAPSAEELDH
PPK12_tr|AOA3D5XRJ5|AOA3D5XRJ5_9FIRM 46 YQKLYAEKK...EGLIIFOAMDAAAGKDGSTIREVLKALAPQGVHEKPPKAPSTELAH
msPPK_PPK26_tr|D7BBL3|D7BBL3_MEISD 43 LQKLYAEHQ...HRVVLVLOAMDAGKDGSTIRHVKLVDPQGVHKEPPKAPSTELER
mrPPK_sp|M9XB82|PK23_MEIRD         46 LQKLYAEHQ...HRVVLVLOAMDAGKDGSTIRVVFQGVNPSGVRVAPSGVPTQELAR
aaPPK_tr|A1R8G0|A1R8G0_PAEAT      57 LQKLYAEKQVPAAGMVGVFDRSQYEDVLIHRVHWGWA...QAVVQVWQRRY
dgPPK_PPK31_tr|Q1IW43|Q1IW43_DEIGD 46 LQKLYAESQ...QALLIVLOAMDAGKDGTVKHVIGAFNPSGVVSNFKVPTEEBRAH
drPPK_tr|Q9RY20|Q9RY20_DEIRA      46 WQRLYAEK...QSLLLVLOAMDAGKDGAVKKVIGAFNPAVQVITSPKQPSAEELSH

```

```

chPPK_tr|Q11YW6|Q11YW6_CYTH3      113 DYLRWHYVALPATGETGIFNRSHYENVLVTIRVHPYVLLSEQTSQVTAIEQVNWQKFWDRRF
tePPK_tr|Q8DI82|Q8DI82_THEEB      112 DFLWRANRALPERGCGIGIFNRSYEEVLLVVRVHPDLLNRQQLPP...ETKTKHIKWRBF
PPK12_tr|AOA3D5XRJ5|AOA3D5XRJ5_9FIRM 102 DYLRVWVHNAVPEKGETITIFNRSYEDVLIIGRVKELYKFNKAD...RIDENVTVDNRY
msPPK_PPK26_tr|D7BBL3|D7BBL3_MEISD 99 DYLRVWVHQHVPAANGELRVIFNRSYEDVLLVAVRHNLV...PAIWSRRY
mrPPK_sp|M9XB82|PK23_MEIRD         102 DYLRVWVHQVVPKGEVLFVFNRSYEDVLLVVRVKNLV...QQVWQRRY
aaPPK_tr|A1R8G0|A1R8G0_PAEAT      117 DFLWRIEKQVPAAGMVGVFDRSQYEDVLIHRVHWGWA...AAELERRY
dgPPK_PPK31_tr|Q1IW43|Q1IW43_DEIGD 102 DFLWRIHRCITPRLGMVGFVFNRSYEDVLLVTRVHLLID...DQTAQRRY
drPPK_tr|Q9RY20|Q9RY20_DEIRA      102 DFLWRIHOKAPAKGYVGFVFNRSYEDVLLVTRVYDMID...DRTAKRRY

```

```

chPPK_tr|Q11YW6|Q11YW6_CYTH3      173 QQTNFQDHTSNGTIVIKFPLHVSKEQKRFIFRTELDTKNWKESGTDKFRRAHWKDY
tePPK_tr|Q8DI82|Q8DI82_THEEB      168 EDTHHYERYLTRNGIILKFFLHISKAEQKRFLEBRISRPBKNWKESELDVRDRRAHWKDY
PPK12_tr|AOA3D5XRJ5|AOA3D5XRJ5_9FIRM 157 EDTRNFERYLYNNSVRIKFFLNVSKAEQABRFLSRIEEPKWKESQSDFEFRYHWKDY
msPPK_PPK26_tr|D7BBL3|D7BBL3_MEISD 144 DHINAEKMLVDEGTTILKFFLHISKEQKRLLEBRLEADKWKKEDQDFEVRGYWQDY
mrPPK_sp|M9XB82|PK23_MEIRD         147 RHTRREFRLADEGGTTILKFFLHISKEQKRLLEBRLEADNPEKWKKFRMGDLEDRRLWQDY
aaPPK_tr|A1R8G0|A1R8G0_PAEAT      162 AINTDFEERLLEGGTTIVKVMVLSKDEQKRLIARLDDPFSKWKYRQDLAERAYWQDY
dgPPK_PPK31_tr|Q1IW43|Q1IW43_DEIGD 147 KHTCAFESLLETSGRTRVYVYVLIHISPEQKRLLEARLADPFSKWKKNPQDLQERAWKDY
drPPK_tr|Q9RY20|Q9RY20_DEIRA      147 EHTRHEBELTQDNATIRKVVYVLIHISPEQKRLLEARLADNPEKWKKNPQDLKDRSNWQDY

```

```

chPPK_tr|Q11YW6|Q11YW6_CYTH3      233 RNAYEDMLANSTKQAPWVIPAEDKWEVTRLLIATICTELEKLNLTFFTVSLEQKAELE
tePPK_tr|Q8DI82|Q8DI82_THEEB      228 QQAYADVFRHTSTKQAPWHIIPANHKWVTRLMVAHFVYQKLAESLNLYHFMLESAHREQLL
PPK12_tr|AOA3D5XRJ5|AOA3D5XRJ5_9FIRM 217 QQAFEDAINATSTKQAPWVVPADRKWVMRYVVSIVVKTLEEMNPKYPTVTKETLERFE
msPPK_PPK26_tr|D7BBL3|D7BBL3_MEISD 204 MEAYQDVLDKRTTOYAPWVIPAEDRKWVRNQLQVSRLLVLEALLEGRLMKYPRFKLNIPLKLS
mrPPK_sp|M9XB82|PK23_MEIRD         207 QEAYEAAIKETSTKQAPWVVPANKNWVRNQLVSHLLETLEGLAQYPRPETAKEKIVI
aaPPK_tr|A1R8G0|A1R8G0_PAEAT      222 MDAYSVAIEKTTSTKQAPWVVPANKNWVAVQVQLLDALGGLQLDWPKADFFVAADRE
dgPPK_PPK31_tr|Q1IW43|Q1IW43_DEIGD 207 TAVVEDVLTSTKQAPWVVPADRKWVRNQLVSHLLETLEEMNPKYPAFANAAIDRI
drPPK_tr|Q9RY20|Q9RY20_DEIRA      207 NDVVEDVLTSTKQAPWVVPADRKWVRNQLVSHLLETLEEMNPKYPAIDYDPSKVVV

```

```

chPPK_tr|Q11YW6|Q11YW6_CYTH3      293 KAKAELVAEKSSD.....
tePPK_tr|Q8DI82|Q8DI82_THEEB      288 EAKALLENPEDED.....
PPK12_tr|AOA3D5XRJ5|AOA3D5XRJ5_9FIRM 277 GYRTKLEEYNYDLDITRPIEK
msPPK_PPK26_tr|D7BBL3|D7BBL3_MEISD 264 ...ELEKM.....
mrPPK_sp|M9XB82|PK23_MEIRD         267 ...E.....
aaPPK_tr|A1R8G0|A1R8G0_PAEAT      282 ...LVVES.....
dgPPK_PPK31_tr|Q1IW43|Q1IW43_DEIGD 266 ...V.....
drPPK_tr|Q9RY20|Q9RY20_DEIRA      266 ...H.....

```

Figure S15. Percentage identity matrix (top) and sequence alignment between PPK12 and previously characterised PPK2-III enzymes. The signature residue for PPK2-III (Glu126<sup>PPK12</sup>) is indicated by the red star. Walker A motif, base binding loop, Walker B motif and the lid domain are indicated by green, blue, red and orange lines, respectively.<sup>4,6</sup> Strict identity is indicated by white characters in red boxes, similarity in a group of sequences ( $\geq 70\%$ ) is indicated by red characters in blue frames (similarity is assigned based on physico-chemical properties). Sequence alignments were produced with MAFFT<sup>7</sup> and visualised with EPrint.<sup>8</sup>

PPK9 1 .....MLKKYTFDGSRKLDL.GAMNTGAKEDKVVKEIIVQRITTVNQLAIQATODKLYADQKEGLIILIQAARDAAAGKD  
 PPK12 1 .....MINIYKIDKLNFNFL.NNHKTDDYSLCKDKDALELTQKNIQKIYDYQOKLYAEKKEGLIIAFQAMDAAGKD  
 PPK7 1 .....MVGKYRVDGKKSIKL.KDFPTADKGFKNKEGLLKLGENIEIISEDONKLYAEDTYSLLIIFQAMDAAGKD  
 PPK14 1 .....MNLKDYCFFGNRPFVLI.EQFDPAQTKGFQLKNEVELEHHTNLLKMQEIQDRLYAENKEALLIIFQGMASGKD  
 PPK8 1 .....MDMSKYRVDPQKMRLL.SDYPQWEDAGYTRTELTEKMIPEVVEKLRDILQRLRHAEEKGIFFVILQAIDTAGKD  
 PPK10 1 .....MTINRHDFLASPEKKLSE.YATAHPDAASYSTEVEKALFEEVISTLRDQOQTRLFAEAKSGIVVILQAMDAAGKD  
 chPPK 1 MATDFSKLSKYVETLRVKKPQKSIDLKKDFD.TDYDHKMLTKEEGEELNLLGTSKLSLSEIQEKLYASGTGSVLLVIFQAMDAAGKD

PPK9 72 STIKHVMMSGINPQGVVYYSFKQPTSDELAHDFTWRVNRHTPRRGKTAIYNRSYVEDVLLVQVRLNLHQT...YMPKWIIVAD  
 PPK12 72 GTIRREVLKALAPQGVHEKPKFSPSSTELAHDYDWRVHNAVPEKGEITIFNRSHYEDVLLGKVKELYKFNKADRID....E  
 PPK7 72 GIIRHVMMSGINPQGVVYYSFKQPTSDELAHDFTWRVNRHTPRRGKTAIYNRSYVEDVLLVQVRLNLHQT...YMPKWIIVAD  
 PPK14 73 SAVKHVMGGVNPQGVVYYSFKQPTSDELAHDFTWRVNRHTPRRGKTAIYNRSYVEDVLLVQVRLNLHQT...YMPKWIIVAD  
 PPK8 73 EILITFIFSHLMPQGLKVTPTKPTTEELKHDFIWRHAGKPERGQVGLNRSYVEDVLLGKVKELYKFNKADRID....E  
 PPK10 75 EAVITVFSNLSVQGLRESEPEGSPSDKELKRDYIWRHHTLTPKRGEITAILNRSYVEEDVLLGSRVHGSYQN...EPMPDKWK.E  
 chPPK 83 GTVGHIMTGLNPGQGVVYYSFKQPTSDELAHDFTWRVNRHTPRRGKTAIYNRSYVEDVLLVQVRLNLHQT...YMPKWIIVAD

PPK9 150 PKFFQKRYSQIRHYEKYLHQNGYRVVKIFLNVSKKTQKBRFLERIEEDPKNWFSESDLKERKLDQYTOAYEDAINATASK  
 PPK12 149 NTIVVDNRVEDIRNFEKYLNNVRIKIFLNVSKKEQABRFLSRIEEDPEKNWFSDSDFERVYWDKYQOAFEDAINATSTK  
 PPK7 149 KDIWKRRFHNIREQERYLFENGVIPKFFLNVSKKEVQKBRFLERIEEDPSKNWFSSADIEERKYWDYQOAYEDAINATSTK  
 PPK14 150 DKIFEQRYSQIKNRYLYENGIKIRVIFKFFLHISKEEQKBRFLERIEEDDQKNWFSDSDMIERYDWEYQRAYHDAINATATR  
 PPK8 150 EEAWEMLRCHQVNAPEKYMVENGFPPVKKFFLSISKEEQKRRLLERMTPEKNWFSESDIKDREKWDYQRAYEEMDLTSTK  
 PPK10 152 GPVWKRRLRHLENERYLITENGFVVLKFFLNVNKNVQKRRLLERMTNPNRNWSESDVDRDKWEDFYHAYDEAIKETSTK  
 chPPK 165 QRFWDKREQQINNEEQHISENGTIVLREFFLHVSKKEQKREIERIEEDTKNWFSESDIKKERAHKDYRNAYEDMLANTSTK

PPK9 232 TSPWYVTPADKRWYTRYLVSQIVRKAMEEMDPQYPAAMPPEQKERLAEYKAOLEEDGPKDRKKSQKDAKPEAVNALAQTEKG  
 PPK12 231 DCPWYVTPADRWYTRYLVSQIVRKAMEEMDPQYPAAMPPEQKERLAEYKAOLEEDGPKDRKKSQKDAKPEAVNALAQTEKG  
 PPK7 231 YAPWYVTPADKRWYTRYLVSQIVRKAMEEMDPQYPAAMPPEQKERLAEYKAOLEEDGPKDRKKSQKDAKPEAVNALAQTEKG  
 PPK14 232 IAPWYVTPADKRWYTRYLVSQIVRKAMEEMDPQYPAAMPPEQKERLAEYKAOLEEDGPKDRKKSQKDAKPEAVNALAQTEKG  
 PPK8 232 IAPWYVTPADNDFARYLASEAMVQVLEEDPQYPAAMPPEQKERLAEYKAOLEEDGPKDRKKSQKDAKPEAVNALAQTEKG  
 PPK10 234 YAPWYVTPADDPWFTRLVIAEIFSQTLESLNPKLPLVLSGEATKLEEKKEKTKKQ.....  
 chPPK 247 QAPWEVTPADKRWYTRYLVSQIVRKAMEEMDPQYPAAMPPEQKERLAEYKAOLEEDGPKDRKKSQKDAKPEAVNALAQTEKG

PPK9 314 TGPTEETVDPADQATGRQESAPAPDLHEPTEHKPELQVESGRPVVQDHDTLTPPETEAUVPAATHPVAALSPLDATAVQEQA  
 PPK12 .....  
 PPK7 .....  
 PPK14 .....  
 PPK8 .....  
 PPK10 .....  
 chPPK .....

PPK9 396 ARQETTIEKPTAKKPAASGRRRGHSRHRKHKGRPAAAQNPETGQAAETKHHFFPKHHGKHSTGQKKQNKSGQSGEAAKD  
 PPK12 .....  
 PPK7 .....  
 PPK14 .....  
 PPK8 .....  
 PPK10 .....  
 chPPK .....

Figure S16. Sequence alignment between sequences falling in the clade comprising PPK12 and chPPK. Strict identity is indicated by white characters in red boxes, similarity in a group of sequences ( $\geq 70\%$ ) is indicated by red characters in blue frames (similarity is assigned based on physico-chemical properties). Residues discussed in the main text are shaded in green.



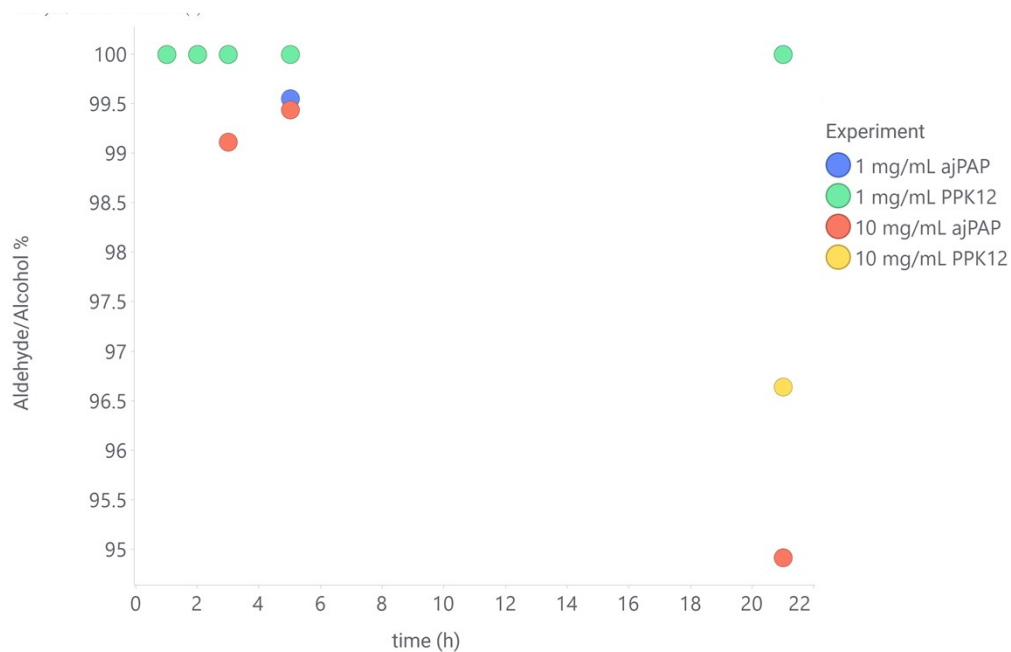

Figure S17. Aldehyde overreduction comparison for ajPAP and PPK12 powered carboxylate reduction.

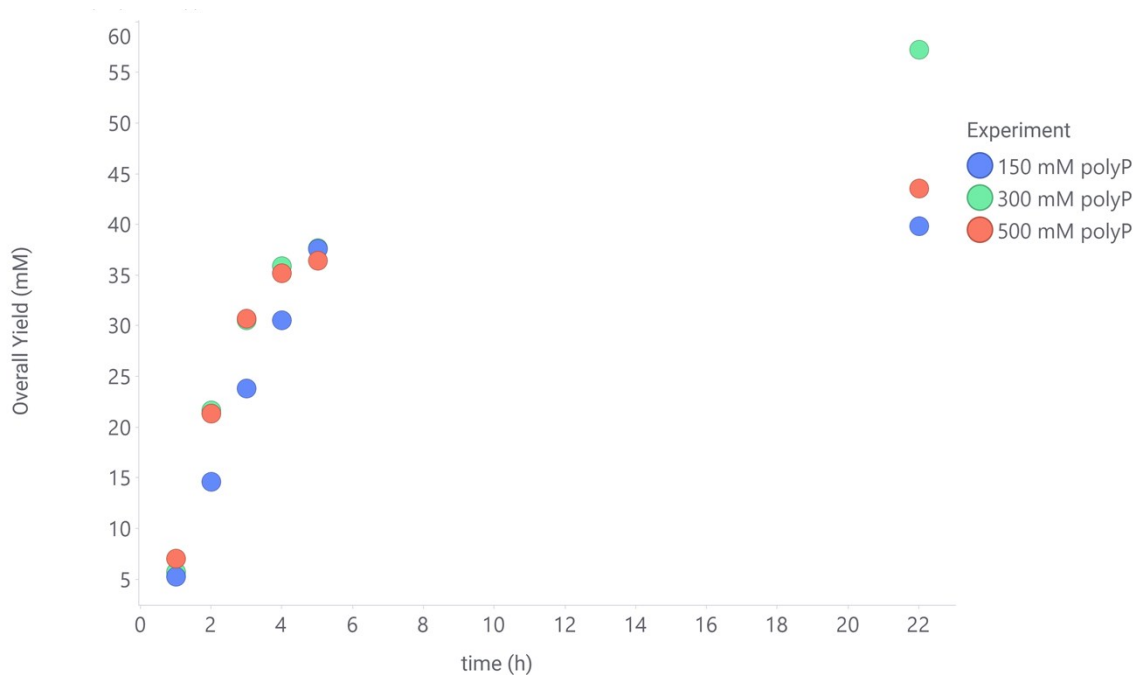

Figure S18. Time course for the CAR-catalysed 4-methoxybenzoic acid reduction with dual cofactor recycling on a 30 mL scale at different polyP loadings. Reactions (30 mL initial volume, 30°C, 400 rpm, 21 h) contained 10 mg/mL CAR33, 1 mg/mL PPK12, 1 mg/mL GDH-CDX-901, 75 mM 4-methoxybenzoic acid, 7% v/v DMSO, different polyP concentrations (see legend), 40 mM MgCl<sub>2</sub>, 1 mM NADP<sup>+</sup>, 300 mM D-Glucose, 1 mM ATP, toluene (50% v/v). 4-methoxybenzoic acid and polyP were added over 5 h. Final concentrations take base additions into account. The overall yield is the sum of aldehyde and alcohol yields.

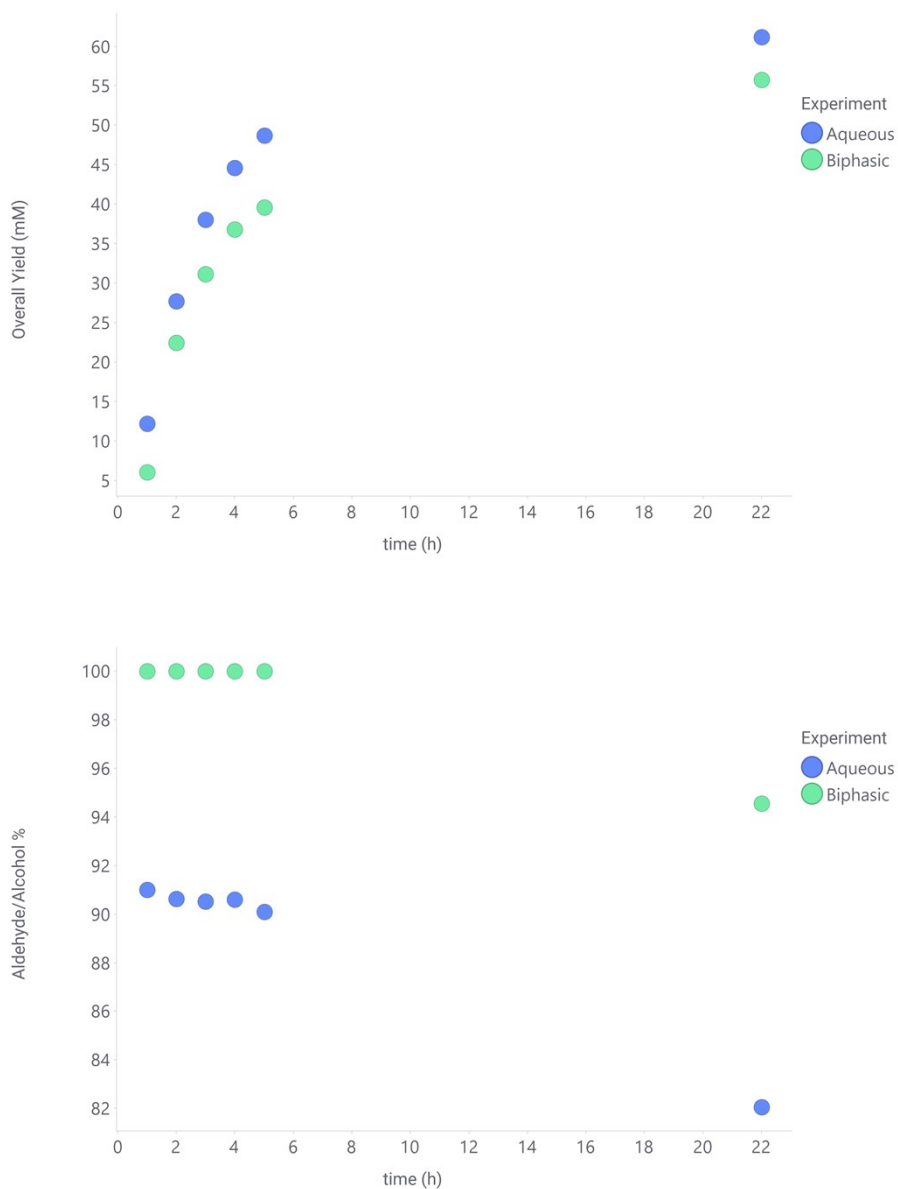

**Figure S19.** Time course for the CAR-catalysed 4-methoxybenzoic acid reduction with dual cofactor recycling on a 30 mL scale (top) and product composition over time (bottom). Reactions (30 mL initial volume, 30°C, 400 rpm, 21 h) contained 10 mg/mL CAR33, 1 mg/mL PPK12, 1 mg/mL GDH-CDX-901, 75 mM 4-methoxybenzoic acid, 7% v/v DMSO, 300 mM polyP, 40 mM MgCl<sub>2</sub>, 1 mM NADP<sup>+</sup>, 300 mM D-Glucose, and 1 mM ATP. Toluene (50% v/v) was included for biphasic reactions. 4-methoxybenzoic acid and polyP were added over 5 h. Final concentrations take base additions into account. The overall yield is the sum of aldehyde and alcohol yields.

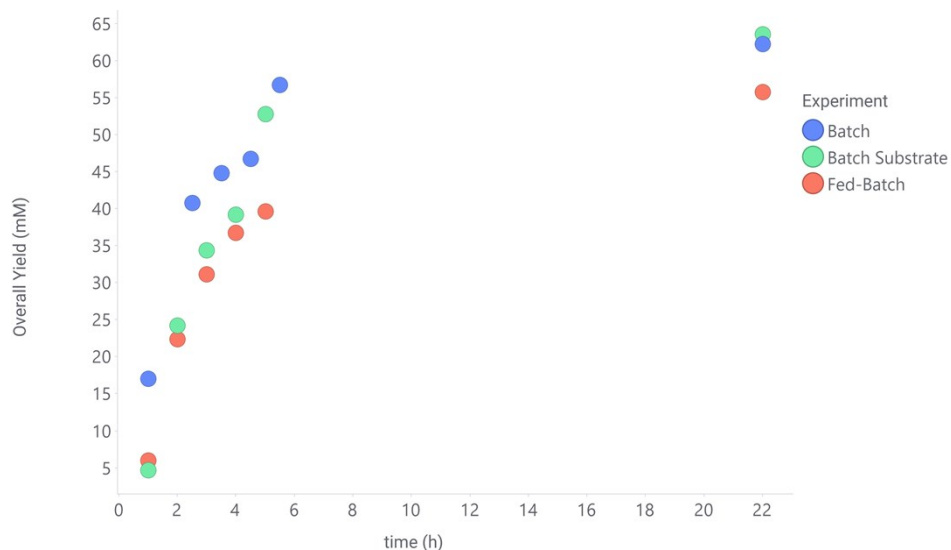

Figure S20. Time course for the CAR-catalysed 4-methoxybenzoic acid reduction with dual cofactor recycling on a 30 mL scale with different feeding strategies. Reactions (30 mL initial volume, 30°C, 400 rpm, 21 h) contained 10 mg/mL CAR33, 1 mg/mL PPK12, 1 mg/mL GDH-CDX-901, 75 mM 4-methoxybenzoic acid, 7% v/v DMSO, 300 mM polyP, 40 mM MgCl<sub>2</sub>, 1 mM NADP<sup>+</sup>, 300 mM D-Glucose, 1 mM ATP, toluene (50% v/v). 4-methoxybenzoic acid and polyP were added over 5 h for “Fed-Batch” reactions, whereas polyP only was added over 5 h for “Batch Substrate” reactions. Both polyP and 4-methoxybenzoic acid were added as a single dose at the beginning of the reaction for “Batch” reactions. Final concentrations take base additions into account. The overall yield is the sum of aldehyde and alcohol yields.

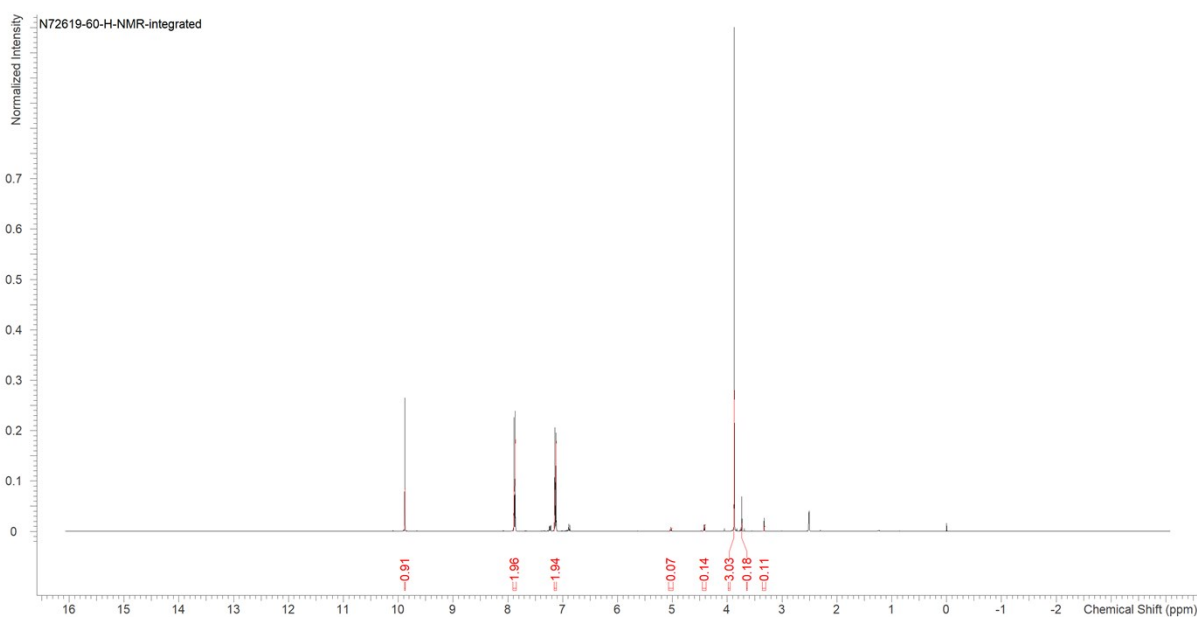

Figure S21. <sup>1</sup>H NMR (400 MHz, DMSO-d<sub>6</sub>) for isolated products after CAR-catalysed 4-methoxybenzoic acid reduction to 4-methoxybenzaldehyde on multigram-scale with ATP recycling by PPK12. Product characterisation was supported by spectra of known compounds.<sup>9, 10</sup>

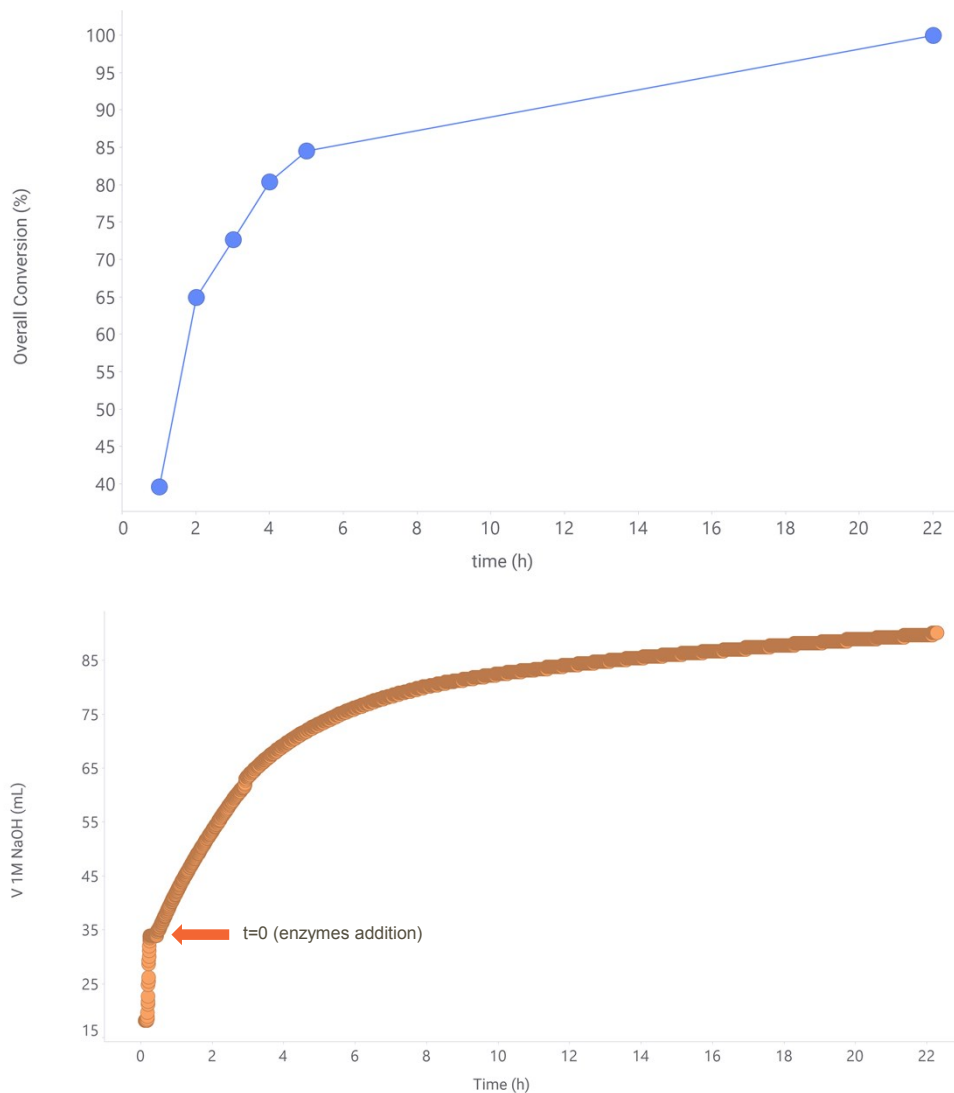

**Figure S22.** Time course for the CAR-catalysed 4-methoxybenzoic acid reduction on a 0.4 L scale with PPK12 ATP regeneration (top) and pH regulation profile (bottom). Reactions (0.4 L final volume, 30°C, 400 rpm, 22 h) contained 7.6 mg/mL CAR33, 0.76 mg/mL PPK12, 0.76 mg/mL GDH-CDX-901, 37.5 mM MgCl<sub>2</sub>, 0.75 mM NADP<sup>+</sup>, 225 mM D-Glucose, 0.75 mM ATP, 235 mM polyP, 65 mM 4-methoxybenzoic acid, 4.3% v/v DMSO and toluene (150 mL, 37.5% v/v). Reported concentrations refer to the final reaction volume (400 mL final volume). The overall conversion is the sum of aldehyde and alcohol conversion values.

## Material and Methods

### General

NADP disodium salt was obtained from Bontac Bio-Engineering. Other compounds were generally obtained from Sigma-Aldrich and were of the highest purity. Sodium hexametaphosphate (crystalline, +200 mesh, 96%, Sigma 305553) was employed as polyphosphate source. Polyphosphate concentrations correspond to the concentration of phosphate units (MW 101.96). NMR spectra were collected using a Bruker Avance 400 Ultrashield instrument and analyzed using ACD Spectrus Processor. UPLC analysis was carried out on an Agilent 1200 Infinity System equipped with G4204A Quaternary Pump, G1316C Column Compartment, G4226A Autosampler and G1314E variable wavelength detector. Competent cells, enzymes for molecular biology and Gibco™ Terrific Broth were purchased from ThermoFisher Scientific. Overnight Express™ Instant TB Medium was purchased from Sigma-Aldrich. Unless stated otherwise, protein production in shake flasks was carried out in Kuhner shakers whereas small-scale biotransformations were carried out using Infors Multitron shakers. Plates were either sealed with gas permeable membranes for protein production growth or with aluminium-based seals for storage/heat shock (Agilent PlateLoc sealer). Whenever possible, transfer and aliquoting operations were carried out using a Beckman Biomek FX liquid handling robot.

Experiment IDs are indicated for matching with raw data that will be submitted to 4TU.ResearchData after manuscript revision and acceptance.

### UPLC Methods

The following ion-pairing method was employed for phosphorylated nucleotide analysis:

AXP\_dev\_6.M

| Time | Flow Rate (mL/min) | %A | %B |
|------|--------------------|----|----|
| 0.00 | 1                  | 95 | 5  |
| 1.3  | 1                  | 59 | 41 |
| 1.40 | 1                  | 10 | 90 |
| 2.00 | 1                  | 10 | 90 |
| 2.10 | 1                  | 95 | 5  |
| 3    | 1                  | 95 | 5  |

*Zorbax RRHD Eclipse Plus C18 column (50mm x 2.1mm i.d. 1.8µm packing diameter)*

60 °C

1 µL injection vol.

260 nm

Mobile phase A = 50 mM hexylammonium acetate (HAA) in water

Mobile phase B = 65:35 IPA/MeCN

For the preparation of mobile phase A, 1M HAA was prepared as follows:

- 5.72 mL Acetic Acid (Sigma, A6283-100mL)
- 13.21 mL Hexylamine (Sigma, 219703-100mL)
- 81.07 mL water (Sigma, 34877-2.5L)

Acetic acid was dissolved in 50 mL H<sub>2</sub>O with vigorous stirring. Hexylamine was then added and the solution stirred for 10 minutes. The remaining water was then added. pH was adjusted to 7 with hexylamine or acetic acid. The following solution was then added to 1900 mL water to generate mobile phase A.

For the analysis of carboxylate reduction reactions, the following method was employed:

CAR\_dev\_50%\_220.M

| Time | Flow Rate (mL/min) | %A | %B |
|------|--------------------|----|----|
| 0.00 | 1                  | 90 | 10 |
| 1.50 | 1                  | 50 | 50 |
| 1.90 | 1                  | 50 | 50 |
| 2.00 | 1                  | 90 | 10 |
| 2.50 | 1                  | 90 | 10 |

Acquity UPLC CSH C18 column (50mm x 2.1mm i.d. 1.7µm packing diameter)

40 °C

0.3 µL injection vol.

220 nm

A = 0.1% (v/v) TFA in water

B = 0.1% (v/v) TFA in acetonitrile

Conversion values for ATP synthesis reactions are area to area based, whereas conversion data for CAR reactions are corrected using relative response factors. Yields for these reactions have been calculated based on the conversion value and the concentration of starting material.

### Construction of Panels

Sequences listed in Table S1 were identified after literature review and BLAST searches. For database mining, ajPAP, rmPPK and mrPPK sequences were used to search for PPK2 enzymes from extremophiles. The selected PPK sequences were assigned to a specific PPK2 class based on the query sequence employed.

PPK2-III panel was constructed starting from PPK2 related proteins (Interpro IPR022488, 28000 proteins). Sequences were filtered by length (150-600 amino acids) using Galaxy web platform (<https://usegalaxy.org/>). The obtained sequences were clustered at 90% sequence identity using CD-HIT<sup>11</sup> (11779 clusters obtained). Sequences were retrieved using UNIPROT, exported in Excel and fragments/poorly annotated sequences filtered out. Sequences for characterised PPK2 enzymes<sup>4</sup> were added for later clustering verification of PPK2 enzymes belonging to different classes. A multiple sequence alignment was performed with MAFFT (standard parameters for large data-sets).<sup>7</sup> A phylogenetic tree was constructed (UPGMA) and visualised in Archaeopteryx.<sup>12</sup> Sequences clustering with reported PPK2-III enzymes were retrieved using UNIPROT (4004 sequences) and divided based on taxonomy (38 sequences from metagenomes, 34 from Archaea and 3930 from Bacteria). Bacterial sequences were further clustered using h-CD-HIT (3 steps, 80, 70 and 60% sequence identity) and a phylogenetic tree constructed with the obtained 686 sequences after sequence alignment. Sequences clustered in 4 major clades. Each individual cluster was manually inspected with a major focus on extremophiles and finally 27 bacterial sequences selected for collation with archaeal and metagenomic sequences.

### Molecular Biology and Gene Acquisition

DNA sequences encoding proteins listed in Table S1 were codon optimised for *E. coli* expression using the GeneArt codon optimisation tool and obtained as gblocks® from IDT. DNA sequences were cloned in pET28a (Novagen) between NdeI and XhoI restriction sites using NEBuilder® HiFi DNA Assembly Cloning Kit according to manufacturer instructions. Sequences encoding the N-terminal 6xHis tag proteins were verified by Sanger sequencing (GeneWiz).

The sequences encoding the selected proteins for the PPK2-III panel were codon optimised for *E. coli* expression, synthesised and cloned by Twist Bioscience. The cloning strategy and receiving plasmid was the same as above. Previously reported PPK2-III included in the panel were obtained from IDT and cloned as indicated above.

## Shake Flask Protein Expression for Small Scale Experiments

BL21(DE3) cells (10 or 50  $\mu$ L aliquots) were transformed with 50-100 ng plasmid (1  $\mu$ L) encoding the desired protein. The transformation protocol followed manufacturer instruction. Outgrowth was carried out after addition of 300 or 900  $\mu$ L SOC for 10 or 50  $\mu$ L aliquots of competent cells respectively. 300  $\mu$ L of the transformation volume were plated in agar plates containing 50  $\mu$ g/mL kanamycin and plates incubated overnight at 37 °C. The following day, 50 mL LB medium containing 50  $\mu$ g/mL kanamycin were added to 250 mL Erlenmeyer flasks and inoculated with a single colony transformed with a pET28a plasmid encoding the protein of interest. Flasks were incubated overnight at 37 °C in a Kuhner shaker (200 rpm orbital shaking). Glycerol stocks were prepared by adding 0.5 mL of the produced seed to 0.5 mL of 50% glycerol in cryogenic vials (Corning). Expression cultures were prepared with 1% inoculation of seeds produced overnight (10 mL) into a 2 L Ultra Yield™ flask (Thomson) containing 1 L medium. Overnight Express medium was employed for the production of ajPAP, CAR33, PPK62 and proteins listed in Table S1, whereas Terrific broth was employed for other enzymes tested in this work. In the former case the medium was supplemented with 1% glycerol. Flasks were sealed with AirOTop™ seals and incubated at 37 °C with 200 rpm shaking. After 2.5-3.5 h (OD 0.6-0.8), flasks containing Overnight Express were moved at 20 °C and protein production continued for 20 h with 200 rpm shaking. IPTG (final 0.5 mM) was added to flasks containing Terrific broth after 2.5 h (OD 0.6-1) before moving them at 20 °C.

Cells were spun down using an Eppendorf 5810R centrifuge at 4000 rpm for 30 minutes and stored at -80 °C until further use.

## Fermenter-scale Enzyme Production

ajPAP and CAR33 employed for scale-up experiments were produced in a 50 L fermenter (35 L working volume, 30 L/min air, 200rpm, 0.2bar).

A sterile Corning Erlenmeyer flask (500 mL) containing Luria Broth medium (100 mL, LB) and kanamycin (50  $\mu$ g/mL final concentration) was inoculated with cells picked from an agar plate containing BL21(DE3) cells transformed with either ajPAP or CAR33 plasmid. The flask was incubated for 6 h at 30 °C in a Kuhner shaker with 200 rpm shaking (primary seed). The secondary seed was prepared with a 1% inoculation from the primary seed into 9 sterile glass Erlenmeyer flasks (500 mL) containing Luria Broth medium (100 mL, LB), kanamycin (50  $\mu$ g/mL final concentration) and glucose (1% final concentration). The mixture was incubated at 30 °C, 200 rpm in a Kuhner shaker overnight. The production stage was initiated with a 2% inoculation using secondary seeds (700 mL) added into a 50 L fermenter containing 35 L of Terrific Broth (prepared with 12 g Tryptone, 24 g Yeast Extract, 2.2 g  $\text{KH}_2\text{PO}_4$  and 9.4 g of  $\text{K}_2\text{HPO}_4$  per litre of medium, 1% glycerol, 5 mL antifoam (Dow Corning 1520) and kanamycin (50  $\mu$ g/mL final concentration). The culture was incubated at 200 rpm, 37 °C for ~150 min until OD 600 nm reached 2.0. Induction was accomplished with 0.5 mM IPTG. Protein production was continued for 23 h at 22.5 °C.

Cells were harvested by centrifugation (6,427 rcf, 4 °C, Sorvall RC 12BP). Cell pellets were kept at -80 °C until further use.

## Production of PPK2-III Panel Enzymes

10  $\mu$ L sterile milliQ water was added to the plate containing DNA synthesised by Twist Bioscience and the content mixed. BL21(DE3) and TOP10 cells (10  $\mu$ L) were transferred into pre-chilled skirted Armadillo PCR Plates (ThermoFisher Scientific). 1  $\mu$ L of plasmid DNA was added to each well containing competent cells. Cells were heat shocked by placing the plates in a thermal cycler at 42 °C for 30 seconds then transferred directly to an ice bath for 2 minutes. LB medium was aliquoted into a 50 mL sterile reservoir and 100  $\mu$ L added to the plates containing cells. The content of each plate was then transferred into Corning Costar 96-deep well plates pre-aliquoted with 400  $\mu$ L LB and plates incubated at 37 °C at 300 rpm 85% humidity for 1 hour. After outgrowth, 500  $\mu$ L LB containing 100  $\mu$ g/mL kanamycin were added to the Costar plates containing cells which were subsequently incubated at 37 °C, 300 rpm, 85% humidity for 3.5 hours. Afterwards, 20  $\mu$ L were transferred from the plate containing transformed cells to Costar 96-deep well plates pre-aliquoted with 480  $\mu$ L LB containing 50  $\mu$ g/mL kanamycin (two copies of such a plate were prepared from plates containing BL21 cells). The cultures were incubated overnight (18-19 hours) at 37 °C, 300 rpm, 85% humidity. The following day, glycerol stocks were prepared by adding 50  $\mu$ L of seed cultures to Nunc plates (ThermoFisher Scientific) pre-aliquoted with 50% glycerol. Glycerol stocks were stored at -80 °C until further use. Expression cultures were prepared by adding 20  $\mu$ L seed to Costar 96-deep well plates pre-aliquoted with 380  $\mu$ L Terrific broth containing 50  $\mu$ g/mL kanamycin. Cells were grown at 37 °C, 300 rpm, 85% humidity. An expression plate was dedicated to OD measurements (100  $\mu$ L culture). A total of 13 plates were grown. After 1h (OD 0.6-0.8) protein production was induced by adding IPTG (0.5 mM final concentration) and incubation continued at 20 °C, 300 rpm, 85% humidity, 20 h.

Cells were spun down using an Eppendorf 5810R centrifuge at 4000 rpm for 20 minutes and stored at -80 °C until further use.

## Cell Lysis and Lyophilised Powders Preparation

Cells were weighed out (typically 20-30 g) and 4 volumes of 50 mM KPi buffer pH 7.5 (CAR33 and PPKs in Table S1) or 50 mM Tris pH 7.5 were added. Bottle containing cells were shaken at 120 rpm, 20 °C for ~20 minutes to aid resuspension. Resuspended cells were filtered through a single layer of muslin cloth into Schott bottles and lysed using a microfluidizer (Microfluidics, 1500-2000 bar operating pressure). Cell lysates were transferred into 50 mL Falcon tubes and centrifuged at 10000 rpm, 4°C, 1 h (Eppendorf 5810R). 1 mL supernatants were withdrawn for subsequent capillary electrophoresis analysis, whereas the remainder was either transferred into square petri dishes or in Lyoprotect Aluminium Trays (Teclen) equipped with Lyoprotect Membrane for volume M tray (Teclen) and Silicone flat gasket (Teclen). Lysates were placed at -80 °C for 1-2 h. Lyophilisation was carried out employing an Advantage Pro with Intellitronics, SP Scientific (48 h program). The resulting lyophilised powders were transferred in pots and stored at -20 °C. No apparent loss in activity for ajPAP and CAR33 was observed within 8 months storage. Powders containing selected PPKs from the PPK2-III panel were stored for 2 months without apparent loss in activity.

Capillary gel electrophoresis was carried out as per manufacturer instruction (PerkinElmer LabChip GXII Touch HT Protein Characterization System) after diluting clarified cell free extracts 2-10-fold.

## High-Throughput Protein Purification

Plates were removed from the -80 °C freezer and allowed to thaw. 200  $\mu$ L lysis buffer (50 mM Tris pH 7.5, 300 mM NaCl, 25 mM imidazole, 10% glycerol, 0.5 mg/mL, 1 mg/mL lysozyme and 0.1  $\mu$ L/mL of benzonase E1014-25 kU) were added to the plates before incubation for 2 h, 1000 rpm, room temperature (18-22 °C). Lysates were clarified by centrifugation (Eppendorf 5810R, 4000 rpm, 10 min, 4 °C) and supernatants transferred into KingFisher™ Flex 96 deep-well plates. High-throughput protein purification was carried out as per manufacturer instructions (ThermoFisher KingFisher Flex System) using a method adapted from "Purify His tag Magnetic Agarose Ni-NTA Direct"



(<https://www.thermofisher.com/uk/en/home/life-science/dna-rna-purification-analysis/automated-purification-extraction/automated-protocols-software.html?open=protein>) for binding across two binding plates. The method entails different transfers of Ni-NTA magnetic agarose beads (200  $\mu$ L for this experiment) in equilibration (50 mM Tris pH 7.5, 300 mM NaCl, 25 mM imidazole, 10% glycerol) and wash buffers (50 mM Tris pH 7.5, 300 mM NaCl, 50 mM imidazole, 10% glycerol) before elution (50 mM Tris pH 7.5, 300 mM NaCl, 300 mM imidazole, 10% glycerol). Once the purification protocol had finished the elution plates were transferred in ice and their content transferred into a skirted Armadillo PCR Plates (ThermoFisher Scientific). Capillary electrophoresis was carried out as above without further dilution of protein samples.

Small Scale Assay of the Initial PPK2 Panel – Experiments N17966-6 & N71966-9

Reactions (1 mL biotransformation volume, 50 mM KPi buffer pH 7.5) were carried out in Corning Costar 96-deep well plates and contained 0.1 mg/mL lyophilised cell free extract, 50 mM polyP, 100 mM MgCl<sub>2</sub> and 1 mM AMP. Negative controls were represented by lyophilised cell free extract containing penicillin acylase. Plates were incubated at 30 °C, 800 rpm using an Infors Multitron shaker. At predefined time points, 150  $\mu$ L of the biotransformation mixture were transferred in a Costar 96-deep well plate pre-aliquoted with 150  $\mu$ L MeCN. Quench plates were shaken (1000 rpm, 5 minutes, room temperature), spun down (Eppendorf 5810R centrifuge, 4000 rpm, 10 minutes, 4 °C) and the supernatant transferred into Nunc plates (ThermoFisher Scientific) for UPLC analysis (AXP\_dev\_6.M).

Small Scale AMP Loading Assay with the Initial PPK2 Panel – Experiment N71966-10

1 M AMP and 2 M polyP stocks were prepared in 50 mM KPi buffer with sonication as needed. Reactions (1 mL biotransformation volume, 50 mM KPi buffer pH 7.5) were carried out in Corning Costar 96-deep well plates and contained 1 mg/mL lyophilised cell free extract, 200 mM polyP, 100 mM MgCl<sub>2</sub> and different concentrations of AMP (20, 40 and 100 mM). Plates were incubated at 30 °C, 800 rpm using an Infors Multitron shaker. At predefined time points, 150  $\mu$ L of the biotransformation mixture were transferred in a Costar 96-deep well plate pre-aliquoted with 150  $\mu$ L MeCN. Quench plates were shaken (1000 rpm, 5 minutes, room temperature), spun down (Eppendorf 5810R centrifuge, 4000 rpm, 10 minutes, 4 °C) and the supernatant transferred into Nunc plates (“receiving plates”). Dilution plates were generated by transferring the content receiving plates into Nunc plates pre-aliquoted with 50 mM KPi buffer so to have ~5 mM total nucleotides in 200  $\mu$ L. These plates were analysed by UPLC (AXP\_dev\_6.M).

Small Scale AMP Loading Assay with the Initial PPK2 Panel – Experiment N71966-12

0.5 M AMP and 5 M polyP stocks were prepared in 50 mM KPi buffer with sonication as needed. Reactions (1 mL biotransformation volume, 50 mM KPi buffer pH 7.5) were carried out in Corning Costar 96-deep well plates and contained 10 mg/mL lyophilised cell free extract, 200 mM polyP, 100 mM MgCl<sub>2</sub> and 200 mM AMP. Plates were incubated at 30 °C, 800 rpm using an Infors Multitron shaker. At predefined time points, 100  $\mu$ L of the biotransformation mixture were transferred in a Costar 96-deep well plate pre-aliquoted with 100  $\mu$ L MeCN (quench plates). Afterwards 5 M polyP was added to the biotransformation plate (18.5, 16.5 and 15  $\mu$ L for the first, second and third polyP dose, respectively) according to the designed plate map. Work-up, dilution and analysis were carried out as in the previous section.

## Small Scale CAR Experiments with Lyophilised Cell-Free Extracts and Aldehyde Reduction Controls – Experiments N72619-3/N72619-4 and N72619-5

Small-scale CAR reactions (500  $\mu$ L biotransformation volume, 50 mM KPi buffer pH 7.5) were carried out in 96-well plates with glass inserts and contained 50 mg/mL CAR33, 10 mg/mL ajPAP, 1 mg/mL GDH-CDX-901, different concentrations of 4-methoxybenzoic acid and polyP (molar ratio polyP:4-methoxybenzoic acid 5:1), DMSO (8% v/v), 100 mM  $MgCl_2$ , 1 mM  $NADP^+$ , 200 mM D-Glucose, 1 mM ATP. A toluene overlay (50% v/v) was added to biphasic reactions. The concentration of each component is calculated over the aqueous layer volume for water soluble compounds and over the entire reaction volume (including toluene) for 4-methoxybenzoic acid. The target substrate/polyP concentration was achieved through batch additions of the substrate along with polyP in 30 minutes intervals. Plates were incubated for 20 h at 30  $^{\circ}C$ , 800 rpm using an Infors Multitron shaker. After 20 h, reactions were transferred to Corning Costar 96-deep well plates and quenched with 2 volumes of 50% MeOH in IPA. Quench plates were shaken (1000 rpm, 5 minutes, room temperature), spun down (Eppendorf 5810R centrifuge, 4000 rpm, 10 minutes, 4  $^{\circ}C$ ) and the supernatant transferred into Nunc plates (ThermoFisher Scientific) for UPLC analysis (CAR\_dev\_50%\_220.M).

Aldehyde reduction control reactions (200  $\mu$ L biotransformation volume, 50 mM KPi pH 7.5) were carried out in Corning Costar 96-deep well plates and contained 1 mg/mL GDH-CDX-901, 10 mM 4-methoxy benzaldehyde, 100 mM polyP, 1 mM ATP, 1 mM  $NADP^+$ , 200 mM D-glucose, 100 mM  $MgCl_2$ , 8% DMSO and different loadings of either ajPAP or CAR33. Plates were incubated for 20 h at 30  $^{\circ}C$ , 800 rpm using an Infors Multitron shaker. Reaction quench and analysis were carried out as above.

### General Procedure for 30 mL-scale CAR Reactions

Reactions were run on an EasyMax102 system equipped with 50 mL reaction vessels. pH was controlled with a SevenExcellence pH Meter and adjusted to pH 7.5 with 1 M NaOH and an SP-50 dosing unit. Temperature was 30  $^{\circ}C$  and stirring 400 rpm. The biotransformations contained 10 mg/mL CAR33, 1 or 10 mg/mL ATP recycling enzyme, 1 mg/mL GDH-CDX-901, 75 or 150 mM 4-methoxybenzoic acid, 7% v/v DMSO, different amounts of polyP, 40 mM  $MgCl_2$ , 1 mM  $NADP^+$ , 300 mM D-Glucose, 1 mM ATP, toluene (50% v/v). 4-methoxybenzoic acid and polyP were added over 5 h for fed-batch reactions from 2 M or 5.8 M stocks, respectively. Final concentrations take dosing into account (final volume  $\sim$ 35 mL). The concentration of each component is calculated over the entire volume at the end of the reaction. At predefined time intervals, reaction aliquots were withdrawn with a plastic Pasteur pipette whose entire content was transferred into 2 mL glass vials ( $\sim$ 0.5 mL biotransformation mixture as judged by graduations on the vial) before quenching with 1 mL of 50% MeOH in IPA. Typically, 5 time points were collected in duplicates. After 5 h, the contents of the vials were transferred in Corning Costar 96-deep well plates which were processed as indicated above. The content of the generated Nunc plates was subsequently diluted 5 or 10-fold in MeOH before analysis for 75 mM or 150 mM substrate loading reactions, respectively.

After 20-22 h, the entire content of the 50 mL vessel was added with 2 volumes of 50% MeOH in IPA, transferred in 50 mL Falcon tubes, spun down (Eppendorf 5810R centrifuge, 4000 rpm, 10 minutes, 4  $^{\circ}C$ ) and the supernatant diluted 5/10 fold in MeOH and analysed.

Experiments IDs (see “General” section) are:

- N72619-50: experiments with 1 and 10 mg/mL PPK12 at 150 mM 4-methoxybenzoic acid loading
- N72619-52: experiment with 1 mg/mL PPK12 at 75 mM 4-methoxybenzoic acid loading
- N72619-53: experiments with 1 and 10 mg/mL ajPAP
- N72619-54: experiments without toluene and PPK12
- N72619-55: experiments at 150 mM polyP loading and PPK12

- N72619-57: experiments with batch 4-methoxybenzoic acid or 500 mM polyP loading both carried out with PPK12
- N72619-58: experiments with batch 4-methoxybenzoic acid and batch polyP with PPK12

#### Screening of Purified PPK2-III Enzymes

Reactions (0.4 mL biotransformation volume, 50 mM Tris buffer pH 7.5) were carried out in Corning Costar 96-deep well plates and contained 30  $\mu$ L purified protein (maximum protein concentration was 0.76 mg/mL as determined by capillary electrophoresis), 5 mM AMP, 50 mM polyP (based on phosphate units) and 50 mM  $MgCl_2$ . At predefined time points, 50  $\mu$ L biotransformation mixture were added into a Greiner 384-well plate pre-aliquoted with 50  $\mu$ L MeOH. Quench plates were shaken (1000 rpm, 5 minutes, room temperature), spun down (Eppendorf 5810R centrifuge, 4000 rpm, 10 minutes, 4  $^{\circ}$ C) and the supernatant transferred into a Greiner 384-well plate for UPLC analysis (AXP\_dev\_6.M). Reactions were performed at 30  $^{\circ}$ C, 800 rpm.

In subsequent experiments with diluted purified proteins, selected purified proteins were diluted 100-fold before addition to the reaction mixture.

ATP formation rates were calculated for data obtained within 15/30 minutes from the start of the reaction with enzyme concentrations leading to a linear increase in ATP concentration over time.

Experiments IDs (see "General" section) are:

- N71966-24: experiments with undiluted purified proteins
- N71966-25: experiments with diluted purified proteins
- N71966-16: experiments with purified ajPAP

#### Screening of Cell-Free Extracts Containing Selected PPK2-III Enzymes

##### *PolyP Tolerance (Experiment N71966-29)*

Reactions (0.4 mL biotransformation volume, 50 mM Tris buffer pH 7.5) were carried out in Corning Costar 96-deep well plates and contained 50  $\mu$ g/mL lyophilised cell-free extract, 5 mM AMP, 100-400 mM polyP (based on phosphate units) and 50 mM  $MgCl_2$ . At predefined time points, 50  $\mu$ L biotransformation mixture were added into a Greiner 384-well plate pre-aliquoted with 50  $\mu$ L MeOH. Reactions were performed at 30  $^{\circ}$ C, 800 rpm. Quench plates were shaken (1000 rpm, 5 minutes, room temperature), spun down (Eppendorf 5810R centrifuge, 4000 rpm, 10 minutes, 4  $^{\circ}$ C) and the supernatant transferred into a Greiner 384-well plate for UPLC analysis (AXP\_dev\_6.M).

##### *Stability (Experiment N71966-30)*

Solutions containing 10 mg/mL lyophilised cell-free extract were prepared. 900  $\mu$ L buffer (50 mM Tris pH 7.5, 0.1 M Tris pH 9 or 0.1 M sodium citrate pH 5) were added to 2 mL glass vials, whereas 700  $\mu$ L or 600  $\mu$ L 50 mM Tris pH 7.5 were added for 20 and 30% DMSO incubations respectively. 675  $\mu$ L of 50 mM Tris pH 7.5 were added to vials for toluene incubations (50% v/v). 200  $\mu$ L or 300  $\mu$ L DMSO were added to vials for 20 or 30% DMSO incubations, respectively. 100  $\mu$ L of the initially prepared enzyme solutions were added to each vial and 75  $\mu$ L were added to vials where toluene incubations were carried out (1 mg/mL final enzyme concentration). Vials were incubated at 30  $^{\circ}$ C using an Eppendorf ThermoMixer® C equipped with a thermoblock suitable for vials (12 mm vessels thermoblock) and a ThermoTop. 100  $\mu$ L sample were withdrawn after 2, 4, 24 and 48h and transferred into a Corning 96-well round bottom plate. Samples were immediately transferred at -80  $^{\circ}$ C until reactions were carried out. After 48h, reactions were carried out following conditions indicated for the polyP tolerance assay (100 mM polyP employed). After 15 minutes, reactions were quenched and analysed as indicated above.

## Procedure for the Multigram-scale CAR Reaction with ajPAP – Experiment N72619-48

Reactions were run on an EasyMax402 system equipped with a 500 mL reaction vessel. pH was controlled with a SevenExcellence pH Meter and adjusted to pH 7.5 with 1 M NaOH and an SP-50 dosing unit. Temperature was 30 °C and stirring 400 rpm. The biotransformations contained 2 mg/mL CAR33, 2 mg/mL ajPAP, 0.2 mg/mL GDH-CDX-901, 50 mM MgCl<sub>2</sub>, 1 mM NADP<sup>+</sup>, 300 mM D-Glucose, 1 mM ATP, 25 mM polyP and toluene (50% v/v), at the beginning of the reaction (250 mL initial volume). The concentration of each component is calculated over the entire biotransformation volume. 37 mmol polyP were added over the first 5 h. 4-methoxybenzoic acid was added over the first 5 h from a 2 M stock in DMSO (final 7% v/v) and its final concentration was 70 mM.

After 5 h from the start of the biotransformation, ajPAP (530 mg), CAR33 (530 mg), GDH (53 mg), MgCl<sub>2</sub> (842 mg), NADP<sup>+</sup> (209 mg), D-Glucose (4.2 g), ATP (150 mg) and 2.9 M polyP (15 mL) were added. Dosing was repeated after 22 h.

Time points were collected and analysed as for reactions carried out on a 30 mL-scale.

After 44 h, the reaction was acidified to pH 2 with 37% HCl (15.5 mL). Precipitated material was filtered under vacuum (starting at 395 mbar) through Celite® 545 (Sigma-Aldrich, 16 g total) into two 500 mL flasks. Filters were washed with toluene (200 mL). The filtrate was transferred into a 1 L separating funnel and the aqueous layer separated. Unreacted starting material was removed with a saturated solution of sodium bicarbonate (50 mL). Brine (2x40 mL followed by another 40 mL addition) was added to try to break the resulting emulsion which was subsequently removed by another filtration step. Another wash with saturated sodium bicarbonate was carried out (100 mL) and the combined aqueous layers extracted with toluene (300 mL). The combined organic phases were dried over MgSO<sub>4</sub> and toluene evaporated under vacuum (55 mbar, 40 °C). The obtained yellow liquid was placed in a vacuum oven for 14 h at 30 °C to remove residual toluene and afford 3 g of isolated products (70.3% isolated yield).

## Procedure for the Multigram-scale CAR Reaction with PPK12 – Experiment N72619-60

Reactions were run on an EasyMax402 system equipped with a 500 mL reaction vessel. pH was controlled with a SevenExcellence pH Meter and adjusted to pH 7.5 with 1 M NaOH and an SP-50 dosing unit. Temperature was 30 °C and stirring 400 rpm. The biotransformations contained 7.6 mg/mL CAR33, 0.76 mg/mL PPK12, 0.76 mg/mL GDH-CDX-901, 37.5 mM MgCl<sub>2</sub>, 0.75 mM NADP<sup>+</sup>, 225 mM D-Glucose, 0.75 mM ATP, 235 mM polyP, 65 mM 4-methoxybenzoic acid, 4.3% v/v DMSO and toluene (150 mL, 37.5% v/v). Reported concentrations refer to the final reaction volume (400 mL final volume).

Time points were collected and analysed as for reactions carried out on with ajPAP.

After 22 h, the reaction was acidified to pH 2 with 37% HCl (12.2 mL). Precipitated material was filtered under vacuum (starting at 395 mbar) through Celite® 545 (Sigma-Aldrich, 22 g total) into two 500 mL flasks. Filters were washed with toluene (100 mL). The filtrate was transferred into a 1 L separating funnel and the aqueous layer separated. The organic layer was washed with a saturated solution of sodium bicarbonate (30 mL). Brine washes (3x30 mL) broke the resulting emulsion. Combined aqueous layers were extracted with toluene (40 mL). The combined organic phases were dried over MgSO<sub>4</sub> and evaporation of toluene under vacuum (55 mbar, 40 °C) yielded 2.6 g products (yellow liquid, 73.4% isolated yield).

## References

1. K. Motomura, R. Hirota, M. Okada, T. Ikeda, T. Ishida and A. Kuroda, *Appl Environ Microbiol*, 2014, **80**, 2602-2608.
2. S. M. Resnick and A. J. Zehnder, *Appl Environ Microbiol*, 2000, **66**, 2045-2051.
3. B. Nocek, S. Kochinyan, M. Proudfoot, G. Brown, E. Evdokimova, J. Osipiuk, A. M. Edwards, A. Savchenko, A. Joachimiak and A. F. Yakunin, *Proc Natl Acad Sci U S A*, 2008, **105**, 17730-17735.
4. B. P. Nocek, A. N. Khusnutdinova, M. Ruzzkowski, R. Flick, M. Burda, K. Batyrova, G. Brown, A. Mucha, A. Joachimiak, Ł. Berlicki and A. F. Yakunin, *ACS Catalysis*, 2018, **8**, 10746-10760.
5. S. Mordhorst, J. Singh, M. K. F. Mohr, R. Hinkelmann, M. Keppler, H. J. Jessen and J. N. Andexer, *Chembiochem*, 2019, **20**, 1019-1022.
6. A. E. Parnell, S. Mordhorst, F. Kemper, M. Giurrandino, J. P. Prince, N. J. Schwarzer, A. Hofer, D. Wohlwend, H. J. Jessen, S. Gerhardt, O. Einsle, P. C. F. Oyston, J. N. Andexer and P. L. Roach, *Proc Natl Acad Sci U S A*, 2018, **115**, 3350-3355.
7. K. Katoh, J. Rozewicki and K. D. Yamada, *Brief Bioinform*, 2019, **20**, 1160-1166.
8. X. Robert and P. Gouet, *Nucleic Acids Res*, 2014, **42**, W320-324.
9. F. Chacón-Huete, C. Messina, F. Chen, L. Cuccia, X. Ottenwaelder and P. Forgione, *Green Chemistry*, 2018, **20**, 5261-5265.
10. L.-Y. Jiang, J.-J. Ming, L.-Y. Wang, Y.-Y. Jiang, L.-H. Ren, Z.-C. Wang and W.-C. Cheng, *Green Chemistry*, 2020, **22**, 1156-1163.
11. Y. Huang, B. Niu, Y. Gao, L. Fu and W. Li, *Bioinformatics*, 2010, **26**, 680-682.
12. M. V. Han and C. M. Zmasek, *BMC Bioinformatics*, 2009, **10**, 356.
